# Supplementary material for: Transcriptomic Profiling of Adult-Onset Asthma Related to Damp and Moldy Buildings and Idiopathic Environmental Intolerance
Source: Int J Mol Sci. 2021 Oct 1;22(19):10679. doi: 10.3390/ijms221910679 (PMC8508786; doi:10.3390/ijms221910679)
Supplement: Supplementary file 1 [file ijms-22-10679-s001.zip]

Archive with 6 entries (6 files):
- __MACOSX/._Suojalehto_SYMBI_Supplement_30.9.2021_MARKED.docx
- __MACOSX/._Table S1.xlsx
- __MACOSX/._Table S2.xlsx
- Suojalehto_SYMBI_Supplement_30.9.pdf
- Table S1.xlsx
- Table S2.xlsx
