# Supplementary material for: Transcriptomic Profiling of Adult-Onset Asthma Related to Damp and Moldy Buildings and Idiopathic Environmental Intolerance
Source: Int J Mol Sci. 2021 Oct 1;22(19):10679. doi: 10.3390/ijms221910679 (PMC8508786; doi:10.3390/ijms221910679)
Supplement: Supplementary file 1 [file ijms-22-10679-s001.zip › Table S1.xlsx]

## Sheet: Summary
comparison	score	<1e-04	<0.001	<0.01	<0.025	<0.05
AADvsCtrl	adj.P.Val	1	1	7	18	38
APDvsCtrl	adj.P.Val	0	0	0	4	14
ANDvsCtrl	adj.P.Val	0	0	1	2	4
IEIvsCtrl	adj.P.Val	1	10	82	169	222

## Sheet: AADvsCtrl
log2FC	AveExpr	t-statistic	P.Value	adj.P.Val	B-statistic	ProbeID	GeneSymbol	score
-0.613667	5.97114	-5.05918	2.52268e-06	0.00302323	4.52172	A_33_P3310189	ADRB1	-3.43539
-1.04451	9.21212	-3.56249	0.000614708	0.0245629	-0.422458	A_32_P9543	APOBEC3A	-3.35427
0.730061	7.61681	3.52269	0.000700585	0.0259138	-0.538386	A_23_P371885	ARL17A	2.303
0.671642	6.95377	3.83766	0.000242963	0.0170701	0.403804	A_23_P146325	ASAP1-IT1	2.42762
-0.815275	7.23363	-3.96253	0.000157302	0.0146947	0.792534	A_33_P3375314	ATP9A	-3.10071
-0.606671	8.38353	-3.28052	0.00152158	0.0347634	-1.22303	A_23_P55020	CD300LF	-1.70942
-0.967813	8.62279	-3.00836	0.00348584	0.0470477	-1.94808	A_23_P209625	CYP1B1	-2.37859
1.08648	13.0889	3.02705	0.00329783	0.0456567	-1.89985	A_22_P00009106	FAM155A-IT1	2.6964
0.583663	6.97864	3.74188	0.000337217	0.0185583	0.111373	A_33_P3710442	FLJ11710	2.02653
-0.826605	12.0504	-3.16827	0.00215382	0.0391735	-1.52793	A_23_P38795	FPR1	-2.20438
-0.638682	6.94806	-3.04896	0.00308951	0.0443514	-1.84303	A_33_P3247042	FPR3	-1.60316
0.614835	8.72058	4.25408	5.5276e-05	0.00914362	1.73128	A_33_P3326733	GOLGA2P6	2.61764
0.623262	8.4074	7.03359	5.47762e-10	1.16662e-05	12.1867	A_19_P00318085	HCG18	5.77229
-0.592152	7.02499	-3.53578	0.000671169	0.0255316	-0.500373	A_21_P0000064	HPSE	-1.879
-0.712075	11.5381	-3.02699	0.00329843	0.0456567	-1.90001	A_33_P3423551	IER3	-1.76715
-0.668287	8.23974	-3.30318	0.00141715	0.0336857	-1.16049	A_23_P24948	KCNE3	-1.90367
0.642275	12.3222	3.0915	0.00271937	0.0424194	-1.73175	A_19_P00317332	LINC00504	1.64778
-0.587298	11.5915	-4.23287	5.97295e-05	0.00956481	1.66157	A_23_P97860	LIPA	-2.48063
0.736653	7.0034	4.11358	9.19804e-05	0.0114561	1.2736	A_19_P00320047	lnc-AC069257.9.1-4	2.97336
0.688923	6.68467	3.92356	0.000180317	0.0154855	0.670327	A_24_P312325	lnc-AF131215.3.1-1	2.5793
0.732742	6.60825	4.1056	9.46514e-05	0.0115767	1.24791	A_22_P00003894	lnc-CEP170-5	2.94846
0.749696	9.20494	2.97635	0.00383098	0.04957	-2.03013	A_22_P00009793	lnc-MEGF11-2	1.81178
0.762133	6.70351	3.75737	0.000319918	0.0181696	0.158309	A_24_P935682	LOC100131541	2.66362
-0.661081	7.61546	-4.9464	3.94943e-06	0.0034671	4.1153	A_22_P00016832	LOC102723894	-3.57213
-0.598967	7.71842	-3.95678	0.000160513	0.0147333	0.774444	A_24_P221968	LOC643802	-2.27278
-0.613913	9.16476	-3.10474	0.00261287	0.0415911	-1.69687	A_23_P36120	MS4A6A	-1.58567
-0.668871	6.83344	-3.60899	0.000527032	0.0224495	-0.285875	A_23_P315815	NRG1	-2.19267
-0.666395	9.71508	-3.31225	0.00137727	0.0331037	-1.13538	A_33_P3277373	OSM	-1.90654
-0.761595	6.65753	-4.29303	4.79176e-05	0.00878703	1.85984	A_24_P243749	PDK4	-3.28971
-0.84289	8.12967	-3.42216	0.00097076	0.0292023	-0.826944	A_23_P145096	PLA2G7	-2.53953
-0.777851	8.35477	-3.05344	0.00304837	0.0441962	-1.83135	A_24_P71468	QPCT	-1.95702
0.664831	6.60796	4.84594	5.8638e-06	0.00431483	3.75723	A_33_P3209254	RPS16P5	3.47828
-0.683962	7.70145	-3.10006	0.00265009	0.0418995	-1.70922	A_33_P3281283	S1PR3	-1.76239
-0.596913	9.54523	-3.26007	0.00162194	0.0351646	-1.27917	A_24_P296508	SLC43A2	-1.66537
0.69375	9.20365	2.99259	0.00365211	0.0483748	-1.98859	A_21_P0000332	SNORA45B	1.69099
0.859798	7.17946	3.32296	0.00133156	0.0330531	-1.10566	A_21_P0000497	SNORD1B	2.47247
0.63866	8.20343	3.92544	0.000179134	0.0154461	0.676219	A_33_P3381483	ZNF331	2.39294
0.77797	9.00854	3.53622	0.000670194	0.0255316	-0.499085	A_33_P3269723	ZSWIM7	2.46912

## Sheet: APDvsCtrl
log2FC	AveExpr	t-statistic	P.Value	adj.P.Val	B-statistic	ProbeID	GeneSymbol	score
-1.02014	9.27413	-3.96509	0.000155894	0.0338799	0.803175	A_23_P131139	DIRC1	-3.88385
-1.23556	10.3179	-4.40577	3.15643e-05	0.0198116	2.21493	A_23_P140675	EPB42	-5.56102
-1.172	8.06419	-3.86775	0.000218959	0.0391759	0.504214	A_33_P3414789	FSD1	-4.28909
-0.878527	10.6154	-4.09301	9.90217e-05	0.0257191	1.20338	A_24_P142495	KRTAP1-3	-3.51786
-1.25208	9.23983	-3.77025	0.000306175	0.0442331	0.209725	A_33_P3311267	KRTAP19-2	-4.39984
-0.67802	6.7151	-3.80211	0.000274558	0.0420686	0.305395	A_33_P3356811	LCE1E	-2.41468
-1.43988	8.21228	-4.09721	9.75432e-05	0.0257191	1.21666	A_22_P00003384	lnc-CCDC102B-8	-5.77507
-1.2865	9.87856	-4.37972	3.47778e-05	0.0200188	2.12899	A_22_P00006598	LOC101927675	-5.73613
-1.02072	8.76793	-3.86238	0.000223071	0.0391759	0.487856	A_33_P3420446	LRRD1	-3.72723
-0.912135	6.63315	-3.74444	0.0003343	0.0447245	0.132634	A_24_P148907	MAB21L2	-3.17046
-0.673451	6.82221	-3.83534	0.000244914	0.0396632	0.405753	A_23_P66241	MT1M	-2.43182
-1.13028	9.17398	-3.97793	0.000149006	0.0334056	0.842983	A_24_P412734	PRSS36	-4.32536
-1.33977	10.4645	-4.47545	2.43152e-05	0.0198116	2.44633	A_22_P00002230	TMEM26-AS1	-6.18186
0.614605	6.02014	4.69813	1.04134e-05	0.0130461	3.19948	A_21_P0012277	XLOC_l2_009448	3.06221

## Sheet: ANDvsCtrl
log2FC	AveExpr	t-statistic	P.Value	adj.P.Val	B-statistic	ProbeID	GeneSymbol	score
-0.79957	6.50454	-4.06627	0.000108949	0.0168144	1.123	A_23_P86470	CH25H	-3.16852
-0.672297	7.16308	-3.68881	0.000403522	0.0286474	-0.0431674	A_23_P117852	KIAA0101	-2.28187
-0.640373	8.05884	-4.43881	2.78981e-05	0.00840431	2.3443	A_33_P3298775	PRSS57	-2.91653
-0.585302	8.65468	-3.33762	0.00127126	0.0481768	-1.05617	A_23_P107421	TK1	-1.6949

## Sheet: IEIvsCtrl
log2FC	AveExpr	t-statistic	P.Value	adj.P.Val	B-statistic	ProbeID	GeneSymbol	score
-0.627814	8.45926	-3.85627	0.000227834	0.00751078	0.440674	A_24_P169343	AAED1	-2.28674
-0.798318	8.61147	-3.67187	0.000427177	0.010154	-0.125846	A_23_P110212	ACSL1	-2.68985
-0.664265	9.72172	-3.59966	0.000543603	0.0111855	-0.342372	A_23_P215566	AHR	-2.16864
0.780568	8.21385	5.07499	2.36818e-06	0.00117296	4.60622	A_32_P44394	AIM2	4.39115
-0.687754	14.2709	-3.42652	0.000957258	0.0150241	-0.848965	A_23_P94501	ANXA1	-2.07631
-1.22677	9.42748	-3.29453	0.00145619	0.0188421	-1.22274	A_23_P106362	AQP9	-3.48007
-0.787534	6.93943	-3.54822	0.000644294	0.0121947	-0.49478	A_23_P128728	ARG2	-2.51295
0.688482	7.61681	3.3551	0.00120275	0.0169756	-1.05257	A_23_P371885	ARL17A	2.01025
-0.750482	7.23363	-3.68389	0.00041026	0.00995185	-0.0895065	A_33_P3375314	ATP9A	-2.54184
-1.19058	8.07627	-4.11138	9.27118e-05	0.00457078	1.2549	A_23_P18372	B3GNT5	-4.80147
-0.738355	8.6331	-5.50624	4.08559e-07	0.000511852	6.22172	A_24_P239731	B4GALT5	-4.71716
-0.851101	12.4025	-4.0865	0.000101353	0.00475505	1.17402	A_23_P4662	BCL3	-3.39944
0.907549	7.25901	3.12103	0.0024872	0.0249635	-1.69708	A_33_P3293913	BICC1	2.36352
-0.896516	8.9317	-3.22039	0.00183463	0.0210983	-1.42782	A_32_P74409	C11orf96	-2.45327
-0.630155	9.50005	-4.10675	9.4263e-05	0.00458649	1.23984	A_23_P431381	C14orf80	-2.53679
-1.52211	8.75325	-3.55368	0.000632815	0.0120876	-0.478669	A_23_P26024	C15orf48	-4.86879
0.695276	8.71567	3.9112	0.000188268	0.00657347	0.613061	A_19_P00809119	CASC15	2.59006
0.712487	7.70593	2.76248	0.00707645	0.0455468	-2.61285	A_23_P396981	CCDC66	1.53198
-1.1532	7.43973	-3.03675	0.00320399	0.0286717	-1.92029	A_23_P89431	CCL2	-2.87644
-0.812403	6.25404	-3.26935	0.00157563	0.0197125	-1.29278	A_23_P78037	CCL7	-2.2768
0.646633	8.49939	3.78856	0.000287599	0.00845868	0.230436	A_22_P00017762	CCNT2-AS1	2.28986
-0.653234	6.20496	-4.64447	1.27989e-05	0.00227159	3.05982	A_23_P331928	CD109	-3.19616
-0.590284	8.07829	-4.07849	0.000104298	0.00479721	1.14804	A_33_P3289356	CD58	-2.35035
1.29965	11.6311	3.86098	0.000224156	0.00744346	0.455375	A_24_P131589	CD86	4.74299
-0.645296	6.64871	-4.21056	6.47871e-05	0.00378037	1.58052	A_23_P66891	CDC42EP4	-2.70283
-0.740934	7.36411	-4.58179	1.62615e-05	0.00237269	2.8409	A_24_P89457	CDKN1A	-3.54821
-0.762241	9.04415	-4.80126	6.98197e-06	0.00170922	3.61457	A_23_P48056	CKAP4	-3.93013
-0.745259	9.01828	-3.23715	0.00174178	0.020653	-1.38176	A_23_P126103	CTH	-2.05617
-0.981362	7.60456	-3.64766	0.000463272	0.0105414	-0.198766	A_21_P0000597	CTSLP8	-3.27202
-0.648376	7.02826	-2.71707	0.00802966	0.0490792	-2.72235	A_24_P183150	CXCL3	-1.35854
0.702492	8.42586	2.88607	0.00498206	0.0370877	-2.30732	A_33_P3359368	DHRS4L1	1.61755
-0.657592	7.21056	-3.81286	0.000264614	0.00821537	0.305574	A_33_P3369317	DNAJB5	-2.35246
-0.640937	10.7561	-3.0379	0.00319304	0.0286338	-1.91728	A_23_P19226	DSE	-1.59965
-0.600376	8.07314	-3.38053	0.00110922	0.016216	-0.980426	A_23_P134935	DUSP4	-1.7741
-0.648813	8.43064	-3.34425	0.00124485	0.0173287	-1.08322	A_24_P941930	EAF1	-1.88473
-0.706348	6.56083	-3.34212	0.00125328	0.0173891	-1.08922	A_24_P355944	EFNB2	-2.04979
-0.67964	9.00579	-4.11944	9.00664e-05	0.00448258	1.28118	A_23_P163458	EHD4	-2.74944
-0.776194	9.76986	-2.82452	0.00594097	0.0411884	-2.46084	A_23_P58506	ELL2	-1.72792
-1.21134	11.0671	-2.78809	0.00658563	0.0435592	-2.55044	A_23_P76488	EMP1	-2.64242
-0.860326	6.83859	-4.29767	4.71066e-05	0.00345928	1.87051	A_23_P210210	EPAS1	-3.72256
-1.15182	9.07228	-3.33953	0.00126359	0.0174753	-1.09652	A_23_P41344	EREG	-3.33844
-0.601487	7.51592	-2.92132	0.00449912	0.0348162	-2.21818	A_23_P46470	ERRFI1	-1.41161
-0.664812	12.7282	-3.43113	0.000943133	0.0148661	-0.83569	A_23_P19590	EZR	-2.01134
-0.584681	5.91818	-4.0075	0.000134239	0.00549718	0.91923	A_33_P3226832	F3	-2.26396
1.34465	13.0889	3.78359	0.000292533	0.00845868	0.215098	A_22_P00009106	FAM155A-IT1	4.75176
-0.602067	9.76631	-2.89087	0.0049136	0.0366935	-2.29524	A_23_P322704	FAM177A1	-1.38993
-0.631597	7.27674	-2.83691	0.00573533	0.0402928	-2.43015	A_23_P128375	FAM222A	-1.41569
-1.44221	11.6369	-3.46407	0.000847951	0.0140871	-0.740635	A_23_P74609	G0S2	-4.42995
-0.845281	10.5084	-3.67815	0.000418255	0.0100537	-0.106864	A_33_P3812669	GABARAPL1	-2.85583
-0.780226	8.78717	-5.46384	4.86911e-07	0.000576124	6.06027	A_33_P3252394	GADD45G	-4.92522
-0.610767	7.30507	-4.18256	7.17184e-05	0.00399858	1.48812	A_24_P331128	GNA15	-2.53124
1.19182	8.91653	3.56119	0.000617363	0.0119533	-0.456507	A_33_P3236416	GPR179	3.82511
0.992469	8.36082	3.08639	0.00276158	0.0264461	-1.78941	A_33_P3243405	GPR182	2.53957
-0.69645	7.55023	-2.97119	0.00388951	0.0320956	-2.09062	A_23_P25155	GPR84	-1.67852
-0.715012	12.9276	-3.32745	0.00131279	0.0178201	-1.13052	A_33_P3299416	GRASP	-2.06053
-0.820711	6.88486	-3.55909	0.000621648	0.0120035	-0.462708	A_23_P27400	HAS1	-2.63157
-0.62975	9.65268	-3.25311	0.00165749	0.0202299	-1.33775	A_33_P3214670	HK2	-1.75105
-1.00007	11.2193	-2.79799	0.00640445	0.0429131	-2.52619	A_33_P3293049	HLA-DQA1	-2.19367
-0.620079	11.6166	-3.0375	0.00319688	0.0286442	-1.91834	A_24_P370472	HLA-DRB4	-1.54727
-0.668744	6.74778	-5.31866	8.84063e-07	0.000646023	5.51163	A_23_P373119	HMGB3P1	-4.04825
-0.864892	11.7706	-3.3334	0.00128837	0.0176297	-1.11381	A_23_P120883	HMOX1	-2.4995
-0.821362	5.88044	-5.96747	5.85983e-08	0.000243707	8.01019	A_23_P66682	HOXB6	-5.94019
-0.900495	9.91405	-4.41725	3.02402e-05	0.00302651	2.27445	A_24_P98411	HSPA5	-4.06971
-0.893397	10.2069	-3.30095	0.0014271	0.0186814	-1.20479	A_23_P153320	ICAM1	-2.5422
-0.648847	8.34085	-3.09723	0.00267283	0.0260473	-1.7606	A_33_P3363355	ICAM4	-1.6695
-0.988066	11.5381	-4.24198	5.77749e-05	0.00359421	1.68471	A_33_P3423551	IER3	-4.18768
0.714846	12.5915	3.13099	0.00241315	0.0246092	-1.67038	A_33_P3379039	IGLL5	1.87105
-0.921129	6.453	-3.85435	0.00022935	0.00753812	0.434684	A_23_P72096	IL1A	-3.35245
-1.43212	13.7442	-3.71702	0.000366872	0.00937425	0.0110823	A_23_P79518	IL1B	-4.92003
-0.60865	9.86808	-3.23101	0.0017753	0.0208092	-1.39867	A_24_P227927	IL21R	-1.67423
-0.823642	8.02772	-3.9731	0.000151561	0.00590746	0.809303	A_23_P71037	IL6	-3.14583
0.660806	6.51491	2.87397	0.00515841	0.0377739	-2.3377	A_22_P00003016	INHBA-AS1	1.51158
-0.910439	10.7376	-3.85677	0.00022744	0.00751011	0.442238	A_33_P3219090	INSIG1	-3.31685
-1.0537	8.67137	-3.4333	0.000936588	0.0148419	-0.829471	A_33_P3352970	IRAK2	-3.19106
-0.598629	6.15911	-4.10977	9.32489e-05	0.00457471	1.24966	A_23_P210763	JAG1	-2.41269
-0.594609	8.81077	-2.74568	0.00741639	0.046874	-2.65354	A_23_P427217	JMJD1C	-1.2664
0.921485	7.46675	3.07372	0.00286875	0.0270827	-1.82297	A_22_P00002238	KCNMA1-AS1	2.3427
0.585161	7.25369	3.39343	0.00106445	0.0158205	-0.943691	A_22_P00016601	KIAA0040	1.73961
-0.616816	6.99144	-3.78905	0.000287118	0.00845868	0.231945	A_23_P53891	KLF5	-2.18473
0.928945	7.60184	3.02379	0.00332997	0.0293307	-1.95421	A_33_P3315263	KRT79	2.30152
-0.821093	7.19189	-3.35585	0.00119986	0.016946	-1.05043	A_23_P363769	KRT86	-2.39831
-0.589247	7.66452	-3.73733	0.000342469	0.00906075	0.0730627	A_24_P53051	LACTB	-2.04197
-0.988504	7.76295	-3.5357	0.000671334	0.0124765	-0.531619	A_33_P3338121	LAMB3	-3.13658
-0.604877	11.0422	-4.3824	3.44339e-05	0.00324014	2.15602	A_23_P47565	LDHA	-2.69957
-0.746543	11.6225	-3.59427	0.000553418	0.0112684	-0.358432	A_24_P117029	LDLR	-2.43145
0.662905	12.3222	3.22253	0.00182252	0.0210575	-1.42195	A_19_P00317332	LINC00504	1.81591
1.19914	9.40297	3.51588	0.000716372	0.0129088	-0.589773	A_19_P00802433	LINC01564	3.77112
-0.763989	11.6439	-3.04031	0.0031702	0.0285277	-1.91096	A_33_P3408762	LMNA	-1.90914
0.771597	7.0034	4.35156	3.86085e-05	0.00331835	2.05173	A_19_P00320047	lnc-AC069257.9.1-4	3.4053
0.80867	7.16212	2.87586	0.00513048	0.0376675	-2.33296	A_22_P00022019	lnc-ARRB2-2	1.85173
0.66609	6.47219	2.86696	0.00526336	0.0382069	-2.35528	A_22_P00002826	lnc-C2orf69-3	1.51784
0.924152	7.62599	2.99207	0.00365766	0.031037	-2.03669	A_22_P00005468	lnc-DYDC1-4	2.25197
1.18291	9.01117	3.37267	0.00113736	0.0164991	-1.00276	A_21_P0008347	lnc-FUT8-1	3.48261
0.93866	7.75811	3.02649	0.00330337	0.0291567	-1.94716	A_21_P0005807	lnc-GFRA2-1	2.32886
0.732829	6.48119	2.93022	0.00438429	0.0344055	-2.19555	A_21_P0009772	lnc-GNG8-1	1.72809
1.31308	10.7764	3.76999	0.000306439	0.00860409	0.173226	A_21_P0001035	lnc-HMCN1-2	4.61371
0.580389	7.80962	3.29554	0.00145156	0.0188413	-1.2199	A_21_P0007853	lnc-HNF1A-1	1.64724
1.09831	8.36121	3.33501	0.0012818	0.0176154	-1.10926	A_21_P0009268	lnc-MAP2K6-2	3.17651
1.2449	10.9764	3.61519	0.000516269	0.0109626	-0.29606	A_33_P3374318	lnc-MFSD9-4	4.09214
-0.748869	9.84035	-3.85151	0.000231618	0.00760091	0.4258	A_21_P0008581	lnc-OR4M2-7	-2.72231
0.633389	6.06353	3.37217	0.00113919	0.0164991	-1.0042	A_22_P00012255	lnc-PPP1R14D-1	1.86432
0.60286	6.54455	6.39442	9.26051e-09	6.57435e-05	9.71053	A_21_P0001493	lnc-PPT1-1	4.84299
0.929032	7.42339	3.20703	0.00191197	0.0214889	-1.46441	A_21_P0004167	lnc-REEP5-1	2.52559
1.12651	9.10241	3.41583	0.000990699	0.0153677	-0.87962	A_21_P0007446	lnc-RP11-201M22.1.1-2	3.38409
1.30189	11.4614	3.75137	0.000326514	0.00884835	0.116042	A_21_P0007070	lnc-RPP30-2	4.53851
0.733545	6.74082	2.95592	0.00406749	0.0328889	-2.12985	A_22_P00025452	lnc-SNX11-2	1.75367
0.955143	7.79261	3.18244	0.00206224	0.0223065	-1.53142	A_21_P0004252	lnc-SNX18-1	2.56519
0.902259	7.44349	2.99587	0.00361697	0.0309002	-2.02686	A_22_P00018488	lnc-SNX24-1	2.203
1.32978	11.7297	3.7922	0.000284042	0.00845731	0.241658	A_21_P0007321	lnc-SOX6-1	4.7162
1.32482	11.7813	3.81186	0.000265516	0.00822777	0.302503	A_21_P0005029	lnc-SUPT3H-1	4.73744
0.662982	8.38616	3.03618	0.00320947	0.0287086	-1.92179	A_22_P00021043	lnc-TCF7L2-2	1.65319
0.716713	8.45757	3.62571	0.000498499	0.0107678	-0.264606	A_22_P00015927	lnc-TCL1B-2	2.36683
0.786151	6.80039	2.94462	0.00420416	0.0336364	-2.15881	A_21_P0002541	lnc-TNP1-2	1.86815
0.98253	8.23392	3.34555	0.00123975	0.0172689	-1.07956	A_22_P00017827	lnc-ZC3H12D-2	2.85589
0.637719	8.41177	3.01187	0.00344978	0.0299281	-1.98529	A_24_P693321	LOC100190986	1.5702
0.8478	7.15923	3.04168	0.00315733	0.0284695	-1.90738	A_21_P0003929	LOC100505811	2.12008
0.91841	7.04131	3.45297	0.000878964	0.0143484	-0.772741	A_22_P00014433	LOC101928741	2.80669
1.04991	8.1536	3.23004	0.00178063	0.0208339	-1.40133	A_22_P00004531	LOC101928894	2.88666
0.610988	13.2023	3.01807	0.00338696	0.0296731	-1.96913	A_33_P3226154	LOC102724332	1.50926
-0.850941	6.73461	-4.48506	2.34522e-05	0.00267259	2.50642	A_33_P3241661	LOC388780	-3.9397
1.37432	12.3768	3.91186	0.000187837	0.00657347	0.615137	A_19_P00800206	LOC400958	5.12101
-0.601998	6.42203	-3.8422	0.000239187	0.00773021	0.396761	A_23_P50638	LRG1	-2.17999
1.14941	8.95868	3.49672	0.00076261	0.0132588	-0.64576	A_23_P334798	LRRC2	3.58351
-0.655554	6.00987	-4.01121	0.000132491	0.005437	0.931102	A_23_P397293	LY6K	-2.54211
-0.584823	7.08701	-3.24438	0.00170313	0.0204356	-1.36185	A_33_P3306264	LYPD3	-1.61923
-0.617931	8.36637	-4.30439	4.59552e-05	0.00344632	1.89304	A_23_P78209	MAFG	-2.68038
-0.597127	10.3299	-3.53459	0.000673778	0.0125001	-0.534874	A_23_P23947	MAP3K8	-1.89378
0.667673	6.3524	2.77028	0.00692347	0.0449973	-2.59389	A_33_P3335735	MAPT-AS1	1.44196
-0.756868	11.5066	-3.64577	0.000466223	0.0105518	-0.204471	A_23_P214222	MARCKS	-2.52144
-0.875969	9.42847	-3.22722	0.00179624	0.0208709	-1.40907	A_23_P330561	MCEMP1	-2.40509
-0.726782	12.8626	-3.07134	0.0028893	0.027162	-1.82926	A_23_P10591	METRNL	-1.84545
-0.889731	10.191	-3.9708	0.000152794	0.00592188	0.801971	A_33_P3236881	MINOS1-NBL1	-3.39512
-0.641031	7.07761	-3.48333	0.000796557	0.0135612	-0.684725	A_24_P184445	MMP19	-1.98641
-0.839576	8.53199	-3.78725	0.000288894	0.00845868	0.226384	A_23_P40174	MMP9	-2.97148
-0.617155	9.7541	-4.26315	5.34715e-05	0.00355891	1.75514	A_23_P120316	MTHFD2	-2.63641
0.608425	15.0574	3.7812	0.000294931	0.00845868	0.207735	A_21_P0003137	MTRNR2L2	2.14791
-0.806443	10.5188	-4.38839	3.36751e-05	0.00320184	2.17634	A_23_P408094	MXD1	-3.60697
-0.702104	10.1626	-3.64145	0.000472991	0.0105928	-0.217422	A_33_P3364869	NAMPT	-2.3346
-1.07564	13.6854	-4.29583	4.74274e-05	0.00345928	1.86433	A_33_P3271111	NINJ1	-4.65102
-1.19511	7.54334	-4.21553	6.36247e-05	0.00376317	1.59698	A_33_P3415052	NIPAL4	-5.01515
-1.06112	10.8084	-3.61826	0.000511034	0.0109058	-0.286909	A_23_P9883	NLRP3	-3.49273
-0.757804	8.89104	-3.26197	0.00161238	0.0199075	-1.31325	A_33_P3337272	NRARP	-2.11619
-0.678296	6.83344	-3.69623	0.00039355	0.00979138	-0.0520948	A_23_P315815	NRG1	-2.3096
-0.837773	6.25308	-4.55619	1.79231e-05	0.00237378	2.75199	A_33_P3244956	NRIP3	-3.97656
-0.718032	9.14809	-3.12065	0.00249008	0.0249665	-1.6981	A_23_P139786	OASL	-1.8696
-0.677978	6.47306	-3.64442	0.000468329	0.010555	-0.208522	A_32_P468743	ODF3L1	-2.25729
0.609895	9.26701	3.47837	0.000809507	0.0137268	-0.699148	A_23_P316850	ODF3L2	1.88566
-0.989087	7.45668	-3.07615	0.00284793	0.0269699	-1.81656	A_24_P124624	OLR1	-2.51769
-0.833256	9.71508	-4.18281	7.16548e-05	0.00399858	1.48892	A_33_P3277373	OSM	-3.45364
-0.774501	12.1866	-5.26392	1.10508e-06	0.000692234	5.30647	A_23_P74278	PDE4B	-4.6134
-0.648586	7.48306	-3.70486	0.000382266	0.00961217	-0.0259179	A_23_P214950	PERP	-2.21663
0.656024	13.4466	3.11669	0.00252012	0.0251398	-1.70869	A_33_P3404097	PGM5P2	1.70473
-0.871153	7.0142	-4.34759	3.91807e-05	0.0033186	2.03832	A_24_P915692	PHLDA1	-3.83911
-1.07204	10.0357	-4.01802	0.000129331	0.00540097	0.952979	A_23_P47614	PHLDA2	-4.16841
0.581952	9.43845	5.43584	5.46553e-07	0.000582024	5.95395	A_24_P403244	PILRB	3.6444
-0.754388	13.1438	-4.67515	1.13769e-05	0.00214429	3.16756	A_23_P61398	PIM3	-3.72968
-0.97869	10.275	-3.55915	0.000621522	0.0120035	-0.462526	A_23_P16469	PLAUR	-3.13821
-0.750749	7.74546	-3.18793	0.00202777	0.0221485	-1.5165	A_33_P3403867	PMEPA1	-2.02175
-0.624877	7.1085	-3.01404	0.00342767	0.0298487	-1.97964	A_23_P100711	PMP22	-1.54032
-0.73767	13.1642	-3.34109	0.00125736	0.0174186	-1.09212	A_23_P140256	PNP	-2.13964
-0.972253	12.3788	-3.48854	0.000783172	0.0134595	-0.669565	A_23_P202104	PPIF	-3.01996
-0.58861	10.5944	-4.23207	5.99029e-05	0.00363479	1.6518	A_24_P405298	PPP1CB	-2.48544
-0.967274	8.49021	-5.33352	8.31956e-07	0.000632821	5.56749	A_24_P201064	PPP1R3B	-5.88093
1.10964	9.55565	3.50428	0.00074403	0.0131931	-0.623686	A_23_P119448	PPP6R1	3.47142
-0.662828	11.6044	-4.074	0.000105985	0.00482136	1.13348	A_23_P109143	PRNP	-2.63458
0.931702	7.54947	3.20698	0.00191225	0.0214889	-1.46454	A_33_P3389827	PROM2	2.53279
-0.775168	8.16626	-2.8583	0.00539547	0.0389007	-2.37691	A_24_P250922	PTGS2	-1.75806
-0.863267	8.06987	-3.14686	0.00229939	0.0239709	-1.62771	A_23_P121064	PTX3	-2.27763
0.91511	7.2465	3.01351	0.00343305	0.0298688	-1.98101	A_21_P0008590	PWRN1	2.25512
-0.620988	7.41964	-3.81152	0.000265833	0.00822777	0.301427	A_33_P3240702	RBBP8	-2.22027
-0.739242	9.85348	-4.6674	1.17207e-05	0.00217068	3.14032	A_33_P3211924	RCOR1	-3.64524
-0.687573	12.2706	-3.5574	0.00062511	0.0120159	-0.467687	A_23_P55706	RELB	-2.20301
1.05764	8.4785	3.06472	0.00294726	0.0273875	-1.84676	A_33_P3247624	REP15	2.67643
-0.596576	5.6103	-3.57934	0.000581453	0.0115759	-0.402767	A_33_P3375790	RFPL4AL1	-1.93021
-0.645974	8.09172	-3.76985	0.000306585	0.00860409	0.172796	A_33_P3305173	RGAG4	-2.2696
-0.643285	13.29	-3.21194	0.00188318	0.0213499	-1.45097	A_24_P10137	RGCC	-1.75302
-0.703429	7.52977	-4.69824	1.0409e-05	0.00204576	3.24892	A_24_P62530	RHOU	-3.5049
-0.79839	8.34325	-3.24796	0.0016843	0.0203587	-1.35199	A_24_P305570	RIN2	-2.2144
0.981088	8.70627	3.22116	0.00183031	0.0210713	-1.42573	A_23_P254212	RPA4	2.6857
-0.765098	7.20812	-3.61345	0.000519263	0.0109764	-0.301251	A_24_P262127	RRAD	-2.51305
0.630789	9.99978	4.32313	4.2888e-05	0.00336866	1.95595	A_23_P34396	RSRP1	2.75508
-0.754019	7.70145	-3.45157	0.000882939	0.0143525	-0.776774	A_33_P3281283	S1PR3	-2.30283
-0.713083	10.049	-2.95788	0.00404423	0.0328005	-2.12483	A_23_P29005	SAMSN1	-1.70652
0.769829	9.60065	3.29568	0.00145096	0.0188413	-1.21953	A_33_P3363082	SCARNA5	2.18504
-0.71133	6.80868	-4.49097	2.29362e-05	0.00267259	2.52673	A_23_P109034	SDC4	-3.3002
0.602207	10.2206	3.7401	0.000339265	0.00902758	0.0815296	A_23_P250212	SGK223	2.08933
-0.594165	7.75219	-2.82155	0.00599126	0.0413754	-2.46817	A_23_P351215	SKIL	-1.32052
-0.830044	6.95856	-4.23784	5.86562e-05	0.00359421	1.67094	A_23_P156180	SLC22A4	-3.51249
0.833776	6.66917	3.20351	0.0019328	0.0216315	-1.47401	A_23_P436284	SLC51B	2.26271
-0.876418	9.76856	-3.10635	0.00260019	0.0255791	-1.73629	A_24_P335620	SLC7A5	-2.26554
0.712576	12.7158	3.10119	0.00264107	0.0258263	-1.75006	A_23_P39034	SMARCA4	1.83718
-0.640408	7.44377	-2.81398	0.00612131	0.0419202	-2.48687	A_23_P72117	SMPDL3A	-1.41732
-0.668471	10.3801	-3.67557	0.000421894	0.0100734	-0.114657	A_23_P131846	SNAI1	-2.25595
0.763145	9.20365	3.32467	0.00132439	0.0178674	-1.13835	A_21_P0000332	SNORA45B	2.19632
0.874372	7.17946	3.41289	0.0010001	0.0154489	-0.888053	A_21_P0000497	SNORD1B	2.62308
0.80264	8.56709	2.80921	0.00620444	0.0421641	-2.4986	A_21_P0000378	SNORD66	1.77167
0.644186	11.4817	3.39715	0.00105185	0.0157319	-0.933064	A_21_P0000386	SNORD89	1.91842
-0.719486	11.054	-5.66697	2.09059e-07	0.000404776	6.83853	A_23_P207058	SOCS3	-4.80598
-0.721907	12.9022	-2.943	0.00422406	0.0337197	-2.16295	A_23_P134176	SOD2	-1.714
0.637289	9.83633	4.25647	5.47938e-05	0.00357673	1.73291	A_33_P3347417	SPEN	2.71566
-0.649982	7.09178	-4.40936	3.11441e-05	0.00308515	2.24759	A_23_P200096	SPSB1	-2.92922
-0.715623	8.50955	-4.46642	2.51548e-05	0.00279035	2.44244	A_23_P146284	SQLE	-3.29142
-0.673163	7.38031	-3.57835	0.00058335	0.0115759	-0.405689	A_23_P387630	STARD8	-2.17706
0.58635	6.60607	2.96983	0.00390507	0.0321576	-2.09412	A_24_P151582	TEF	1.41215
-1.21941	10.948	-3.42477	0.00096265	0.0150643	-0.85398	A_23_P91390	THBD	-3.67838
-0.632614	6.93838	-3.58964	0.000561976	0.011345	-0.372202	A_33_P3415820	THBS1	-2.05618
-0.649181	6.85038	-3.49451	0.000768105	0.0133109	-0.652184	A_23_P369899	TMEM158	-2.02192
-0.903865	7.94701	-2.98535	0.00373083	0.0314316	-2.05407	A_23_P49338	TNFRSF12A	-2.19476
-0.655562	7.89191	-2.95212	0.00411295	0.0331433	-2.1396	A_21_P0000178	TREM1	-1.56407
-0.859666	6.05084	-4.73319	9.0946e-06	0.00188055	3.37248	A_23_P132760	TRH	-4.33376
-0.802407	11.3495	-3.24548	0.00169732	0.0204199	-1.35882	A_23_P254271	TUBB6	-2.22286
-0.75315	8.81457	-3.19585	0.00197896	0.0219064	-1.49492	A_23_P371824	TUFT1	-2.03619
-0.815941	8.04523	-3.60758	0.000529511	0.011024	-0.318796	A_23_P160460	UAP1	-2.67312
-0.64871	5.90142	-5.36677	7.26049e-07	0.000617672	5.69271	A_33_P3422802	ULBP1	-3.98245
-0.732622	6.37647	-4.02573	0.000125846	0.00534373	0.977739	A_23_P145485	ULBP2	-2.85734
-0.745027	9.15193	-3.59639	0.000549542	0.0112216	-0.352124	A_23_P162589	VDR	-2.42879
-0.989473	8.00908	-4.54082	1.89985e-05	0.00241585	2.69875	A_24_P12401	VEGFA	-4.67158
-0.639499	15.5535	-3.45783	0.000865265	0.0142414	-0.758703	A_23_P161190	VIM	-1.95869
1.2347	12.3677	3.8477	0.000234685	0.00764268	0.413921	A_24_P18802	VPS18	4.48135
0.608437	6.10788	2.90721	0.00468696	0.0355499	-2.25396	A_21_P0011269	XLOC_l2_004385	1.41712
0.582529	6.78546	3.07287	0.00287608	0.0271039	-1.82522	A_21_P0013784	XLOC_l2_015585	1.48032
0.669841	9.00854	3.075	0.00285774	0.0270147	-1.81959	A_33_P3269723	ZSWIM7	1.70406
