# Supplementary material for: Transcriptomic Profiling of Adult-Onset Asthma Related to Damp and Moldy Buildings and Idiopathic Environmental Intolerance
Source: Int J Mol Sci. 2021 Oct 1;22(19):10679. doi: 10.3390/ijms221910679 (PMC8508786; doi:10.3390/ijms221910679)
Supplement: Supplementary file 1 [file ijms-22-10679-s001.zip › Table S2.xlsx]

## Sheet: Summary
comparison	score	<1e-04	<0.001	<0.01	<0.025	<0.05
AADvsCtrl	adj.P.Val	2	9	44	76	109
APDvsCtrl	adj.P.Val	4	14	62	111	153
ANDvsCtrl	adj.P.Val	1	16	94	151	202
IEIvsCtrl	adj.P.Val	2	7	26	51	101

## Sheet: AADvsCtrl
log2FC	AveExpr	t-statistic	P.Value	adj.P.Val	B-statistic	ProbeID	GeneSymbol	score
-0.775803	9.56919	-5.24531	1.72518e-06	0.00102198	4.92071	A_23_P55477	ADORA2B	-4.47108
-0.605363	6.60758	-3.48247	0.000880402	0.0244469	-0.755181	A_24_P353619	ALPL	-1.84958
0.979003	7.93528	4.20974	7.79933e-05	0.00718456	1.43433	A_23_P136777	APOD	4.02169
0.59496	14.4872	3.37607	0.00122819	0.0287937	-1.05281	A_23_P71270	AZGP1	1.73177
-0.614936	10.4074	-3.04924	0.00328529	0.0489829	-1.92591	A_33_P3220911	BST2	-1.52715
-1.63167	9.97759	-3.30672	0.00152086	0.0321206	-1.24335	A_23_P26024	C15orf48	-4.59791
-1.0447	9.53286	-3.75853	0.000361265	0.0154487	0.0454414	A_33_P3347869	C3	-3.59604
-0.592759	6.28937	-3.22968	0.00192253	0.0365085	-1.45175	A_23_P41217	CD200R1	-1.61001
-0.998153	10.1017	-4.31337	5.4178e-05	0.00595419	1.76597	A_23_P218442	CEACAM6	-4.2583
-0.988311	10.0391	-3.62691	0.000555051	0.0191412	-0.341262	A_23_P156687	CFB	-3.21761
0.745052	8.43993	3.97597	0.000174535	0.0103141	0.703083	A_23_P12082	CHI3L2	2.79999
0.677371	11.1784	3.09265	0.00289284	0.0458177	-1.81364	A_32_P32254	COL6A1	1.71963
0.97869	6.22659	3.97996	0.000172188	0.0102502	0.715348	A_23_P117851	CPLX3	3.68379
1.3621	6.73312	3.4598	0.000945611	0.0253399	-0.819139	A_23_P112859	CST1	4.11938
1.22776	6.56623	3.37994	0.00121355	0.0285884	-1.0421	A_24_P237175	CST2	3.58009
-1.02186	10.48	-3.23747	0.00187778	0.0359396	-1.43083	A_23_P114713	CYP4B1	-2.78594
1.1928	10.919	3.24762	0.00182093	0.0352405	-1.40353	A_23_P46429	CYR61	3.26791
-0.795266	10.4401	-3.69518	0.000444675	0.0171161	-0.141767	A_23_P56559	DHRS9	-2.6657
0.926856	13.1854	4.59001	2.00734e-05	0.00358488	2.67195	A_33_P3300312	DMBT1	4.35379
-1.12354	9.50303	-3.16684	0.00232179	0.040603	-1.61912	A_23_P151851	DUOX2	-2.9596
-1.89323	7.80187	-3.70226	0.000434518	0.0169128	-0.120959	A_33_P3250443	DUOXA2	-6.36502
-0.583893	6.34992	-5.15605	2.42793e-06	0.00120346	4.60703	A_33_P3359012	DUSP8	-3.27842
-1.07103	5.90571	-6.42914	1.57781e-08	7.66438e-05	9.23568	A_33_P3610406	ECEL1P2	-8.35614
-0.697662	14.3816	-4.05407	0.000133707	0.00874438	0.944667	A_23_P210210	EPAS1	-2.70264
-0.664393	7.00212	-3.43284	0.00102909	0.0264882	-0.89481	A_33_P3360972	EXOC3L4	-1.98491
-0.704303	12.8421	-3.63871	0.000534269	0.0188002	-0.306949	A_33_P3226832	F3	-2.30465
0.589299	7.9419	3.57801	0.000649646	0.0208988	-0.482642	A_23_P12199	FAM46B	1.87829
-0.642997	8.14937	-3.41209	0.00109804	0.0272641	-0.952779	A_23_P323751	FAM83D	-1.90287
-0.604098	6.20864	-3.83311	0.000282178	0.0132299	0.268456	A_33_P3262171	FER1L6	-2.14423
0.615042	12.0679	3.68385	0.000461424	0.0174141	-0.175059	A_23_P53176	FOLR1	2.05172
-0.622563	5.32835	-5.66474	3.3732e-07	0.00043688	6.42026	A_33_P3406493	GABBR2	-4.0292
0.689057	7.34669	3.27414	0.00167999	0.0338057	-1.3319	A_23_P47484	GLYATL2	1.91192
-0.736915	7.97422	-5.46678	7.3247e-07	0.000637257	5.7076	A_23_P365218	GPR110	-4.52113
-0.642755	9.41239	-3.25079	0.00180355	0.0351281	-1.395	A_33_P3221999	GSDMB	-1.76364
0.784987	7.12136	4.04863	0.000136222	0.00884641	0.927764	A_19_P00323082	H19	3.03457
-1.11711	6.95493	-3.83591	0.000279566	0.0131847	0.276857	A_32_P118397	HEPACAM2	-3.96966
-0.786444	10.8776	-4.49542	2.82785e-05	0.00426601	2.35891	A_23_P122443	HIST1H1C	-3.57717
-0.646828	8.77902	-3.78825	0.000327496	0.0147301	0.133976	A_23_P309381	HIST2H2AA4	-2.25406
-0.584265	8.03427	-4.10775	0.000111154	0.00815621	1.11235	A_23_P436281	HIST2H4B	-2.31023
-0.643514	11.0122	-3.48178	0.000882328	0.0244469	-0.757137	A_23_P121657	HS3ST1	-1.96553
0.84782	6.1372	3.57307	0.000660006	0.0209314	-0.496846	A_23_P9711	HS3ST4	2.69645
0.78582	6.75806	3.50198	0.000827749	0.0238057	-0.699944	A_23_P212945	HTN3	2.42198
-1.56783	9.10038	-3.3089	0.00151075	0.0320183	-1.2374	A_23_P112026	IDO1	-4.42256
-0.944655	12.9499	-4.74237	1.14826e-05	0.00273422	3.18279	A_24_P270460	IFI27	-4.66656
-0.648323	8.04071	-4.33177	5.07619e-05	0.00587098	1.82531	A_23_P104798	IL18	-2.7842
0.589649	10.2947	3.26006	0.00175353	0.0346703	-1.37	A_23_P128084	ITGA7	1.62512
0.612436	7.88327	3.27085	0.00169692	0.0339711	-1.34083	A_23_P109881	ITIH4	1.69665
0.632479	9.00968	6.9274	2.05612e-09	2.35336e-05	11.107	A_23_P92042	ITPR1	5.49432
0.650974	6.27768	5.41678	8.89672e-07	0.000641914	5.52895	A_33_P3352088	JAKMIP3	3.93889
0.632083	8.25247	3.41311	0.00109454	0.0272641	-0.949925	A_33_P3260530	KANK4	1.87145
0.75015	6.97129	5.30278	1.38289e-06	0.000907775	5.12379	A_32_P192692	KCNMA1	4.39529
-0.642199	9.09092	-4.43624	3.49817e-05	0.00470205	2.16477	A_23_P120103	KCNS3	-2.86174
0.70128	12.017	4.17746	8.72898e-05	0.00765378	1.33193	A_33_P3256793	KIAA1324	2.84652
1.04095	9.21292	4.06853	0.000127229	0.00856176	0.989728	A_32_P128209	LINC01554	4.05491
0.716526	7.61084	4.61352	1.84256e-05	0.00349626	2.75024	A_21_P0008575	lnc-ALDH1A3-1	3.39245
0.607419	7.96101	4.11883	0.00010698	0.00804434	1.14711	A_22_P00003909	lnc-CERK-1	2.41188
0.829641	6.92674	4.57048	2.15513e-05	0.00368366	2.60703	A_21_P0013944	lnc-JMJD7-PLA2G4B-1	3.87154
0.68666	8.65794	3.68616	0.000457963	0.0173943	-0.168281	A_21_P0005438	lnc-RP11-1220K2.2.1-1	2.29287
-0.789549	7.03946	-5.93682	1.14686e-07	0.0003095	7.41215	A_22_P00014191	lnc-SDR42E1-1	-5.47986
0.692206	7.14369	4.48761	2.90858e-05	0.00431031	2.33321	A_21_P0009357	lnc-SLC39A11-3	3.14007
0.603204	10.4686	3.77266	0.000344814	0.0150147	0.0874802	A_22_P00016450	lnc-TMEM63A-1	2.08854
-0.779874	7.6841	-3.67582	0.000473647	0.0175804	-0.198594	A_22_P00021672	LOC101927023	-2.59273
-0.908332	6.28313	-5.18429	2.17964e-06	0.00116862	4.70605	A_21_P0013178	LOC102659288	-5.14262
-0.649261	6.20939	-4.79881	9.31807e-06	0.00236015	3.37401	A_21_P0005135	LOC102723649	-3.26622
0.811236	7.85261	4.1964	8.17128e-05	0.00735183	1.39197	A_21_P0010750	LOC102725199	3.3161
0.581286	8.49942	4.46867	3.11372e-05	0.00444859	2.271	A_33_P3812038	LOC340335	2.61969
0.642622	5.40652	4.98605	4.62642e-06	0.00172325	4.01557	A_22_P00006231	LOC644135	3.42823
0.582555	10.5389	3.2933	0.00158463	0.032725	-1.27991	A_23_P100583	LPO	1.6312
-0.612938	7.27916	-4.25401	6.67882e-05	0.00651022	1.57545	A_24_P240187	LRRN1	-2.5592
0.835458	15.6099	4.47725	3.01909e-05	0.00436474	2.29917	A_23_P166848	LTF	3.77638
-1.16219	9.82543	-3.96612	0.000180469	0.0105113	0.672797	A_23_P94186	LYPD2	-4.35077
-0.603376	6.50805	-3.72993	0.000396878	0.0162091	-0.0393214	A_32_P131031	MACC1	-2.05229
0.618442	6.08441	3.9107	0.000217628	0.0115409	0.503299	A_23_P145786	MLXIPL	2.26491
-0.629946	8.03194	-3.92889	0.000204688	0.0111756	0.558771	A_23_P357351	MPV17L	-2.32381
-0.729701	7.00957	-4.832	8.23718e-06	0.00219851	3.48692	A_33_P3233645	MT1G	-3.70996
-0.955391	6.28897	-3.70376	0.000432386	0.0168839	-0.116527	A_23_P155236	MUC13	-3.21406
-0.622143	9.00308	-3.56374	0.000680026	0.0211764	-0.523669	A_33_P3226775	MUC20	-1.97062
-0.672328	6.67153	-3.48657	0.000869091	0.0242723	-0.743601	A_23_P204885	PCDH20	-2.05795
0.651244	9.39889	3.08387	0.0029685	0.0463658	-1.83644	A_23_P89589	PER1	1.64599
-0.652798	7.26267	-3.17861	0.00224156	0.0400316	-1.58796	A_22_P00007891	PKIB	-1.72955
0.593549	8.75452	3.09105	0.00290656	0.0459002	-1.81782	A_23_P39251	PLIN5	1.50561
0.704589	7.10843	5.57614	4.77776e-07	0.000527465	6.10027	A_33_P3357163	PPIEL	4.45355
0.631758	9.90431	3.48314	0.000878559	0.0244427	-0.753304	A_23_P129835	PPP1R1B	1.9308
0.760377	15.8446	3.25099	0.00180247	0.0351281	-1.39447	A_23_P76291	PRR4	2.08657
-0.800604	10.8793	-3.45044	0.000973823	0.0257089	-0.845442	A_23_P111000	PSMB9	-2.41103
-0.780479	8.45623	-3.50351	0.000823749	0.0237615	-0.695604	A_23_P414654	RAB37	-2.40716
-0.760098	10.1767	-3.42549	0.00105304	0.0266974	-0.915374	A_32_P25050	RDH10	-2.26324
0.618972	6.38177	4.28222	6.04768e-05	0.00627718	1.66581	A_23_P118122	RGS11	2.61108
0.649101	12.9158	3.38099	0.00120962	0.0285513	-1.03921	A_23_P48596	RNASE1	1.89365
0.655308	6.89941	4.18966	8.36577e-05	0.00746219	1.37057	A_23_P399255	RNF182	2.67202
-0.961574	7.74609	-5.66141	3.41762e-07	0.00043688	6.40823	A_23_P5370	RPRM	-6.2178
0.636793	8.14226	3.57424	0.000657546	0.0209311	-0.493494	A_33_P3409086	S100A1	2.02632
-1.15112	15.0339	-4.7097	1.29522e-05	0.00288608	3.07259	A_23_P58266	S100P	-5.62626
0.946262	13.9976	3.17292	0.00227999	0.0403031	-1.60303	A_33_P3210379	SCGB3A1	2.50009
-0.699295	9.71272	-3.15272	0.00242163	0.0414493	-1.65641	A_24_P48204	SECTM1	-1.82928
1.20149	9.84351	3.37073	0.00124871	0.0290806	-1.06759	A_23_P2920	SERPINA3	3.48857
-0.654132	12.1209	-4.16676	9.06005e-05	0.00774826	1.2981	A_23_P158725	SLC16A3	-2.64457
-0.850235	5.90137	-3.93037	0.000203666	0.0111662	0.563301	A_33_P3370600	SMIM6	-3.13828
-0.736818	9.3892	-3.05799	0.00320241	0.0483659	-1.90337	A_23_P77103	SORD	-1.83801
0.633998	8.94993	3.18383	0.00220678	0.0397318	-1.5741	A_23_P66137	SOX8	1.68405
-0.730243	8.92597	-3.34542	0.0013503	0.0302931	-1.13736	A_24_P274270	STAT1	-2.09548
-0.599313	7.17361	-4.03392	0.000143258	0.00906841	0.882086	A_33_P3307500	STRA6	-2.30369
-0.722049	6.43781	-3.63482	0.000541036	0.0189074	-0.318267	A_23_P155786	SULT1E1	-2.35877
0.905975	13.6362	4.44397	3.40252e-05	0.00464273	2.19006	A_23_P64372	TCN1	4.04808
-0.63763	6.74641	-4.10312	0.000112944	0.00818862	1.09784	A_32_P86763	TGM2	-2.51681
-1.28023	9.56632	-3.09802	0.00284747	0.0454569	-1.79968	A_23_P130333	TTR	-3.25888
-0.96526	7.68572	-4.02587	0.000147256	0.00924173	0.857125	A_32_P56249	USP30-AS1	-3.69881
-1.11444	11.8542	-3.90441	0.00022228	0.0116856	0.48416	A_23_P55356	VMO1	-4.07115
-0.603984	9.56127	-4.13699	0.000100463	0.00795318	1.2042	A_23_P65651	WARS	-2.41473

## Sheet: APDvsCtrl
log2FC	AveExpr	t-statistic	P.Value	adj.P.Val	B-statistic	ProbeID	GeneSymbol	score
-0.698928	7.55743	-3.88752	0.000235255	0.0119788	0.42617	A_33_P3367984	ABCA12	-2.53603
-0.831812	10.1893	-4.02762	0.000146378	0.0094303	0.857006	A_24_P152968	AKR1C1	-3.18961
-0.763751	7.91611	-4.38127	4.25749e-05	0.00504419	1.98309	A_23_P149926	AKR1C4	-3.33824
-0.797063	10.3025	-3.88952	0.000233687	0.0119776	0.432233	A_33_P3329028	AKR1C8P	-2.89443
-0.698183	11.1068	-3.24534	0.00183359	0.0349014	-1.42105	A_23_P207213	ALDH3A1	-1.91072
-0.661836	12.2522	-3.31787	0.00146976	0.0315368	-1.22379	A_32_P105549	ANXA8L1	-1.87482
-0.74686	6.75615	-3.78086	0.000335592	0.0145033	0.104429	A_24_P109214	APOC1	-2.59473
-0.802484	11.805	-5.22317	1.8781e-06	0.000954246	4.84839	A_33_P3209591	AQP3	-4.59525
-0.586443	6.3799	-3.03483	0.00342607	0.0480441	-1.97561	A_23_P76743	ASPG	-1.4457
-0.835654	8.3818	-3.17017	0.00229883	0.038932	-1.62218	A_23_P118815	BIRC5	-2.20487
0.756557	14.6687	3.91207	0.000216628	0.0115637	0.500985	A_23_P154784	BPIFB1	2.77224
1.04726	6.39724	3.32121	0.00145478	0.0314689	-1.21464	A_23_P57222	BPIFB3	2.9713
-1.89992	9.97759	-4.68272	1.43031e-05	0.00253572	2.98209	A_23_P26024	C15orf48	-9.20429
-0.656201	7.04408	-3.29522	0.00157536	0.0327029	-1.28573	A_33_P3285945	CCL21	-1.83908
-0.618857	8.19568	-3.01181	0.00366286	0.0498674	-2.03461	A_23_P65757	CCNB2	-1.50765
-0.930741	9.03027	-4.2328	7.19465e-05	0.0069619	1.50393	A_23_P111583	CD36	-3.85605
-0.779985	7.23017	-3.53309	0.000749887	0.02188	-0.620764	A_23_P57379	CDC45	-2.43746
-1.12688	9.55935	-5.08483	3.18398e-06	0.0010773	4.36249	A_23_P153301	CEACAM5	-6.19448
-0.855871	10.1017	-4.49807	2.8009e-05	0.0038914	2.36619	A_23_P218442	CEACAM6	-3.89653
-0.795168	10.0391	-3.54894	0.000712936	0.0215103	-0.575327	A_23_P156687	CFB	-2.50235
-0.671411	9.16908	-3.2383	0.0018731	0.0349684	-1.44004	A_23_P71727	CKS2	-1.83123
-0.833709	7.83737	-3.68804	0.000455155	0.0169293	-0.170963	A_23_P45751	CLCA4	-2.78612
-0.601924	9.26719	-3.2201	0.0019789	0.0359567	-1.48895	A_33_P3343196	CP	-1.62735
-0.717655	7.83778	-4.21018	7.78747e-05	0.00721916	1.43171	A_23_P134347	CPVL	-2.94856
-0.581355	12.8517	-4.47774	3.01378e-05	0.00411228	2.29913	A_23_P44724	CSRP2	-2.62824
-0.582522	7.73874	-3.2766	0.00166748	0.0334709	-1.33642	A_23_P111888	CTHRC1	-1.61821
-0.652748	9.09722	-3.22768	0.00193418	0.035537	-1.4686	A_33_P3262742	DAPL1	-1.77123
-1.49565	7.88258	-3.33507	0.00139408	0.0307724	-1.17656	A_23_P157628	DEFB4A	-4.27116
-0.59854	6.06121	-4.72431	1.2274e-05	0.00233946	3.12245	A_23_P94275	DKK4	-2.93944
0.973011	13.1854	5.86026	1.55585e-07	0.000209935	7.14444	A_33_P3300312	DMBT1	6.62429
0.744612	8.67987	3.60535	0.000595008	0.0195821	-0.412574	A_23_P320261	DMKN	2.40173
0.641534	8.53692	4.80065	9.25478e-06	0.00200696	3.38164	A_23_P129413	DPEP3	3.22925
-1.7098	9.50303	-5.86113	1.55047e-07	0.000209935	7.14763	A_23_P151851	DUOX2	-11.643
-2.37759	7.80187	-5.65455	3.51131e-07	0.000370794	6.39373	A_33_P3250443	DUOXA2	-15.3462
-0.805972	7.86365	-3.28843	0.00160835	0.0329929	-1.30421	A_23_P408955	E2F2	-2.25158
0.588508	10.6056	3.52422	0.000771336	0.0222528	-0.646115	A_21_P0000188	ELF5	1.83188
0.732016	8.53309	3.38298	0.00120214	0.0284576	-1.0441	A_33_P3527931	ERICH4	2.13752
0.583082	7.38899	3.46619	0.000926789	0.0246522	-0.810993	A_32_P41604	F5	1.7685
-1.28024	11.0947	-3.59933	0.000606657	0.0197249	-0.430037	A_32_P204676	FABP5	-4.11862
-0.69581	8.56465	-4.04415	0.000138328	0.0093585	0.908444	A_23_P103765	FCER1A	-2.68519
-0.818179	9.17442	-4.06543	0.000128593	0.00905293	0.974826	A_23_P212830	FGFR3	-3.18336
0.952251	12.0679	6.93659	1.9798e-09	3.70002e-05	11.168	A_23_P53176	FOLR1	8.2878
0.70788	7.09235	6.61375	7.43723e-09	3.70002e-05	9.94872	A_24_P252996	FOLR3	5.75406
0.926379	7.82383	5.48167	6.91169e-07	0.000599539	5.76936	A_23_P81717	FRMD1	5.70688
-0.669669	10.4111	-3.60105	0.000603299	0.0197	-0.425038	A_23_P67847	GALNT14	-2.15598
0.591632	10.9129	3.55733	0.00069411	0.0211128	-0.551254	A_23_P129064	GATM	1.86871
-0.61342	6.4333	-3.76408	0.000354714	0.0149312	0.0543064	A_23_P26511	GDPD3	-2.11637
-0.597688	7.86313	-4.10032	0.000114044	0.00858475	1.0841	A_23_P121120	GPR87	-2.35664
-0.609341	8.72639	-3.54155	0.000729956	0.0217536	-0.596544	A_23_P3038	GPX2	-1.91132
-0.992212	7.21712	-3.11264	0.00272728	0.0428833	-1.77381	A_23_P52067	GRHL3	-2.5443
-0.696441	10.8776	-4.84155	7.94943e-06	0.0018838	3.52127	A_23_P122443	HIST1H1C	-3.55161
-0.611683	8.77902	-4.35686	4.6438e-05	0.00534543	1.9037	A_23_P309381	HIST2H2AA4	-2.6505
0.670824	9.34445	4.0664	0.000128165	0.00904903	0.977859	A_23_P14986	HSD11B2	2.611
-0.703139	8.56429	-3.27993	0.00165063	0.0333809	-1.32736	A_33_P3246829	IL1RN	-1.95638
0.639561	8.57555	3.44906	0.000978058	0.0252574	-0.859292	A_23_P153964	INHBB	1.92484
0.61688	9.51606	3.71138	0.000421749	0.0162336	-0.102133	A_33_P3297562	IRX2	2.08194
0.68874	8.25247	4.52302	2.55955e-05	0.0037494	2.4487	A_33_P3260530	KANK4	3.16258
0.590205	6.13531	3.49043	0.00085854	0.0235526	-0.742335	A_23_P501193	KCNJ16	1.80971
-0.86693	8.3298	-3.83213	0.000283106	0.0131717	0.258379	A_23_P117852	KIAA0101	-3.07591
0.713399	12.017	5.16834	2.31662e-06	0.00102302	4.65519	A_33_P3256793	KIAA1324	4.02011
-0.621196	7.11968	-4.01301	0.000153864	0.00971972	0.811659	A_23_P218058	KLRC4	-2.36854
-1.42795	8.94368	-3.92035	0.000210668	0.0113862	0.526296	A_24_P228149	KRT13	-5.24972
-0.612948	13.0966	-3.66422	0.000491856	0.0175679	-0.240943	A_23_P27133	KRT15	-2.02773
-1.79896	7.50786	-3.13767	0.00253244	0.0410875	-1.70809	A_23_P4387	KRT24	-4.67093
-1.10615	10.3638	-3.41641	0.00108333	0.0269187	-0.950919	A_23_P2674	KRT4	-3.28
-0.696769	11.7034	-3.35318	0.00131836	0.0300208	-1.12665	A_23_P218047	KRT5	-2.00667
-0.764164	5.541	-3.42768	0.00104584	0.0263587	-0.919363	A_23_P90453	KRTDAP	-2.27762
-0.894468	8.16975	-4.70922	1.29753e-05	0.0023931	3.07146	A_24_P11506	KYNU	-4.37116
-0.901501	10.8054	-3.51314	0.000798969	0.0226434	-0.677744	A_24_P238250	LGALS7	-2.79237
0.612951	8.39228	4.26982	6.31753e-05	0.00648931	1.62257	A_22_P00017815	LINC00638	2.57406
1.08623	9.21292	5.16335	2.36122e-06	0.00102409	4.63763	A_32_P128209	LINC01554	6.11209
-0.657551	6.48622	-3.9026	0.00022364	0.0117571	0.472087	A_23_P258493	LMNB1	-2.40036
0.855329	7.61084	6.69778	5.27482e-09	3.70002e-05	10.2653	A_21_P0008575	lnc-ALDH1A3-1	7.08023
0.635147	6.22184	5.29935	1.40134e-06	0.000830142	5.11808	A_21_P0004521	lnc-C5orf27-1	3.71781
1.09632	8.45243	3.58631	0.000632579	0.020296	-0.467715	A_21_P0005477	lnc-NPVF-4	3.50702
0.778183	8.65794	5.08056	3.23604e-06	0.0010773	4.34757	A_21_P0005438	lnc-RP11-1220K2.2.1-1	4.27221
0.651279	7.14369	5.13504	2.63047e-06	0.00103274	4.53824	A_21_P0009357	lnc-SLC39A11-3	3.63411
0.664484	8.13933	4.06724	0.000127795	0.00904903	0.980486	A_21_P0008570	lnc-USP8-2	2.58716
0.611658	8.78469	3.33719	0.00138502	0.030637	-1.17074	A_21_P0012584	LOC101060498	1.74845
0.625123	6.95601	4.20396	7.95856e-05	0.00731671	1.41189	A_21_P0013727	LOC101928413	2.56248
-0.601719	8.56597	-3.31888	0.00146521	0.0315368	-1.22102	A_21_P0014535	LOC102724348	-1.70533
0.776948	10.5389	5.34175	1.18978e-06	0.000802703	5.26885	A_23_P100583	LPO	4.60305
-1.27262	12.4696	-4.01532	0.00015266	0.0097063	0.818802	A_33_P3268622	LY6D	-4.85667
-0.907627	9.82543	-3.76699	0.000351322	0.0148916	0.0629974	A_23_P94186	LYPD2	-3.13521
-0.606625	6.60046	-3.35785	0.00129948	0.0298213	-1.11375	A_23_P94422	MELK	-1.75086
0.616829	10.6425	3.68037	0.000466675	0.0171253	-0.193524	A_23_P4714	MIA	2.05465
-0.692618	6.28897	-3.26553	0.00172459	0.0339582	-1.36644	A_23_P155236	MUC13	-1.91392
-0.734636	7.71248	-3.72218	0.000407099	0.0159221	-0.0701975	A_33_P3275035	MUC21	-2.49064
-0.591763	7.83149	-3.25751	0.00176713	0.0342538	-1.38816	A_23_P50108	NDC80	-1.62896
-1.17401	10.0039	-3.55894	0.000690542	0.0210702	-0.546619	A_23_P69537	NMU	-3.71083
-0.6649	7.42866	-3.42846	0.00104329	0.0263424	-0.917177	A_33_P3350488	NUSAP1	-1.98246
0.763882	13.6449	3.7141	0.000418007	0.0161451	-0.0940843	A_23_P58228	ODAM	2.58102
-0.639459	7.01158	-3.42063	0.00106916	0.0267157	-0.93912	A_23_P379614	OIP5	-1.89981
0.62073	7.43255	5.13174	2.66373e-06	0.00103274	4.52667	A_24_P39195	OXGR1	3.46026
-0.666216	8.66219	-4.15206	9.53496e-05	0.00794536	1.24716	A_22_P00011377	P2RY2	-2.67864
-1.10346	8.3913	-4.21457	7.66878e-05	0.00716542	1.44572	A_33_P3358208	PADI1	-4.54106
-0.888535	7.18458	-3.40216	0.00113257	0.0276988	-0.990735	A_32_P62997	PBK	-2.61756
-0.839723	9.3547	-4.55405	2.28755e-05	0.00345093	2.5516	A_32_P214665	PCP4L1	-3.89684
0.956	7.86598	3.04137	0.00336152	0.0474953	-1.95881	A_33_P3341105	PDE6G	2.36463
0.611993	9.39889	3.5245	0.00077066	0.0222528	-0.645326	A_23_P89589	PER1	1.90522
-0.944494	11.2246	-3.88369	0.000238303	0.0120833	0.414497	A_23_P210465	PI3	-3.42178
0.720346	10.1706	4.24002	7.01483e-05	0.00687001	1.52702	A_33_P3308332	PLEKHB1	2.9923
-0.767997	8.14177	-3.52075	0.000779901	0.0223856	-0.656039	A_33_P3619171	PMAIP1	-2.3869
1.43132	15.0743	3.58062	0.00064422	0.0204266	-0.484131	A_33_P3217776	PRB4	4.56728
-0.644908	10.8793	-3.38028	0.00121226	0.028637	-1.0516	A_23_P111000	PSMB9	-1.88081
-0.736459	10.1297	-4.63566	1.69941e-05	0.00288639	2.82398	A_23_P18493	PTPN13	-3.51269
-0.782678	7.09611	-3.92593	0.000206743	0.0112829	0.543364	A_23_P101642	PTPRH	-2.88383
-0.764703	9.90819	-3.81032	0.000304393	0.0137694	0.192733	A_23_P7636	PTTG1	-2.68913
-0.609405	7.60162	-3.08108	0.00299295	0.0447341	-1.85612	A_23_P18579	PTTG2	-1.53808
-0.591571	9.53255	-5.1074	2.92232e-06	0.00104378	4.4414	A_23_P204484	RAB35	-3.27391
-0.661729	7.38681	-3.80058	0.000314387	0.0140031	0.163493	A_23_P161563	RAB38	-2.31773
-0.707052	10.1767	-3.87527	0.000245124	0.0122754	0.388913	A_32_P25050	RDH10	-2.55289
-0.602632	7.42809	-4.40515	3.90982e-05	0.00482039	2.06099	A_23_P96209	REEP4	-2.65631
-0.72174	8.93533	-4.37816	4.3049e-05	0.0050756	1.97297	A_23_P424561	RHOV	-3.15114
0.679207	6.89941	5.28121	1.50275e-06	0.000848808	5.05373	A_23_P399255	RNF182	3.9551
0.613041	8.9968	3.70347	0.000432793	0.0164245	-0.125479	A_32_P184464	ROPN1	2.0621
-0.759215	11.2984	-3.43823	0.00101185	0.0259566	-0.889745	A_23_P124619	S100A14	-2.27376
-0.629134	11.1998	-3.70677	0.00042815	0.016388	-0.115737	A_23_P147918	S100A16	-2.11918
-1.16133	13.222	-3.84514	0.00027109	0.0128526	0.297667	A_33_P3376249	S100A2	-4.14232
-2.56487	10.9158	-3.42156	0.00106605	0.0267157	-0.936517	A_23_P434809	S100A8	-7.62335
-1.69832	10.4793	-4.09314	0.000116902	0.00868452	1.06156	A_23_P23048	S100A9	-6.67809
-0.883907	15.0339	-4.39823	4.0075e-05	0.00491587	2.03842	A_23_P58266	S100P	-3.88665
-0.815489	13.7138	-5.53806	5.54579e-07	0.000498874	5.97232	A_33_P3371718	SAT1	-5.10173
-1.42133	7.13174	-3.42995	0.00103844	0.0262959	-0.913002	A_23_P500000	SCEL	-4.2407
1.22368	13.9976	4.99017	4.55504e-06	0.00132047	4.03309	A_33_P3210379	SCGB3A1	6.53632
-0.740404	6.09375	-4.09107	0.000117735	0.00868452	1.0551	A_23_P2645	SDS	-2.90912
-0.663926	9.71272	-3.64035	0.000531447	0.0184397	-0.310765	A_24_P48204	SECTM1	-2.17405
-0.939374	12.5667	-3.1464	0.00246757	0.0404188	-1.68507	A_33_P3389286	SFN	-2.44963
-0.586215	11.9549	-3.49132	0.00085613	0.0235526	-0.739811	A_23_P19673	SGK1	-1.79819
-0.593853	6.03961	-3.09766	0.00285049	0.0437504	-1.81295	A_23_P351148	SH2D1B	-1.5114
0.636931	7.3097	5.14433	2.53896e-06	0.00103274	4.57083	A_23_P348146	SLAIN1	3.56385
0.942115	6.46744	3.31645	0.00147618	0.0315383	-1.22768	A_23_P201248	SLC26A9	2.667
-0.679489	6.11991	-5.18763	2.152e-06	0.000986182	4.72305	A_23_P133036	SLC34A2	-3.85077
-0.617151	7.24501	-3.33166	0.0014088	0.0308888	-1.18595	A_33_P3242623	SLC7A11	-1.75959
0.646476	9.22778	3.99147	0.000165581	0.0100793	0.744964	A_33_P3381235	SLCO4A1-AS1	2.44432
0.582484	15.9777	3.63728	0.000536743	0.018544	-0.319705	A_24_P190472	SLPI	1.90486
-2.17277	11.5748	-3.38427	0.00119735	0.0284451	-1.04053	A_23_P62709	SPRR3	-6.34836
0.608385	6.13816	6.29704	2.69589e-08	7.27531e-05	8.76131	A_32_P152195	STAC2	4.60505
-0.625377	11.2908	-3.58865	0.000627838	0.020224	-0.460942	A_23_P59005	TAP1	-2.00255
0.766363	13.6362	4.5718	2.14477e-05	0.00333924	2.61065	A_23_P64372	TCN1	3.57785
-0.786637	10.3501	-3.5668	0.000673389	0.0208879	-0.523986	A_23_P107421	TK1	-2.495
-1.22681	9.98203	-4.77738	1.00887e-05	0.0021285	3.30242	A_33_P3374678	TMPRSS11D	-6.12935
-0.653918	6.83466	-3.28055	0.00164752	0.0333809	-1.32568	A_23_P118834	TOP2A	-1.81996
-0.887044	8.88476	-3.50543	0.000818735	0.0229619	-0.6997	A_23_P50096	TYMS	-2.73818
-0.613064	8.15018	-4.34068	4.91837e-05	0.00553043	1.85121	A_23_P60599	UGT1A6	-2.64119
-0.614325	9.18765	-3.92732	0.000205774	0.0112829	0.547626	A_23_P52336	UNC5B	-2.26478
-1.24391	8.41774	-5.04006	3.77291e-06	0.00120574	4.20636	A_24_P200219	UPK1B	-6.74612
-0.732063	8.10072	-3.01089	0.00367263	0.0499614	-2.03696	A_23_P122724	VNN2	-1.78259
-0.695359	7.5057	-3.57697	0.000651821	0.0205145	-0.494689	A_23_P209978	VSNL1	-2.21533
-1.18263	10.7567	-4.15829	9.33064e-05	0.00789626	1.2669	A_21_P0009341	WFDC21P	-4.76611
-0.622896	10.4233	-4.33333	5.04816e-05	0.0056243	1.82741	A_33_P3270863	XDH	-2.6765
0.810398	7.68794	4.03274	0.000143837	0.00941918	0.872924	A_23_P104804	ZBTB16	3.11365
-0.700502	6.88055	-3.54116	0.000730867	0.021754	-0.597665	A_33_P3208970	ZNF683	-2.19689

## Sheet: ANDvsCtrl
log2FC	AveExpr	t-statistic	P.Value	adj.P.Val	B-statistic	ProbeID	GeneSymbol	score
1.50891	13.9976	5.46378	7.41071e-07	0.000584278	5.70979	A_33_P3210379	SCGB3A1	9.2498
1.08519	10.5389	6.62494	7.10501e-09	8.62833e-05	10.0043	A_23_P100583	LPO	8.84258
0.939094	12.0679	6.0742	6.61832e-08	0.000160746	7.94203	A_23_P53176	FOLR1	6.74199
1.04819	13.1854	5.60563	4.25573e-07	0.000469833	6.22211	A_33_P3300312	DMBT1	6.67805
1.10897	7.93528	5.1496	2.48841e-06	0.000851248	4.5919	A_23_P136777	APOD	6.21475
1.20325	9.60684	4.76973	1.03785e-05	0.0016461	3.27659	A_22_P00000015	lnc-RP1-177G6.2.1-2	5.99685
0.98514	7.82383	5.17616	2.24844e-06	0.000842017	4.68543	A_23_P81717	FRMD1	5.56419
0.745547	7.09235	6.18513	4.23618e-08	0.000160746	8.35445	A_24_P252996	FOLR3	5.49694
0.722912	10.0885	6.14198	5.0402e-08	0.000160746	8.19382	A_23_P5983	PLTP	5.27549
1.05928	11.5958	4.72989	1.20238e-05	0.0017699	3.14128	A_24_P70183	MYH11	5.21162
1.16289	10.3065	4.40237	3.94871e-05	0.00320757	2.04994	A_33_P3275801	DES	5.12085
1.04283	6.59601	4.68456	1.42065e-05	0.00191693	2.98795	A_23_P114862	ANGPTL7	5.05515
0.838673	12.017	5.39506	9.67924e-07	0.000602793	5.4632	A_33_P3256793	KIAA1324	5.04391
0.800153	7.61084	5.5636	5.01826e-07	0.000477193	6.06985	A_21_P0008575	lnc-ALDH1A3-1	5.04052
1.37413	6.39724	3.86949	0.000249911	0.00882244	0.36655	A_23_P57222	BPIFB3	4.94991
1.283	9.53804	3.76601	0.000352464	0.0107411	0.0547213	A_23_P254797	BPIFB2	4.43004
0.96994	14.6687	4.45343	3.28901e-05	0.00286364	2.21745	A_23_P154784	BPIFB1	4.34818
0.843865	9.96055	4.86023	7.41475e-06	0.00143738	3.58596	A_21_P0009163	LINC01563	4.32895
1.48706	8.77692	3.32335	0.00144525	0.0240097	-1.21614	A_23_P29965	SMR3B	4.22333
0.806867	9.90431	4.80402	9.13962e-06	0.0015432	3.39351	A_23_P129835	PPP1R1B	4.06586
0.662389	9.65455	5.41812	8.8507e-07	0.000595212	5.54582	A_23_P35414	PPP1R3C	4.00945
0.971197	10.6239	4.02363	0.000148386	0.00671134	0.840574	A_23_P125233	CNN1	3.71833
0.702115	6.8377	4.93806	5.54152e-06	0.00124623	3.85406	A_23_P159952	BEX1	3.69058
0.68243	7.43255	5.00962	4.23281e-06	0.00111819	4.10223	A_24_P39195	OXGR1	3.66695
0.837378	10.1706	4.37657	4.32931e-05	0.00342509	1.96566	A_33_P3308332	PLEKHB1	3.65397
0.950142	9.21292	4.01034	0.000155274	0.00686937	0.799257	A_32_P128209	LINC01554	3.619
0.727441	11.4645	4.71523	1.26914e-05	0.00180263	3.0916	A_33_P3277447	SLC26A2	3.56191
0.589647	6.75503	5.33233	1.23388e-06	0.000696943	5.2391	A_33_P3313314	SORBS1	3.48406
0.616969	13.6106	5.16363	2.3587e-06	0.000842471	4.64128	A_23_P161439	ADIRF	3.47189
0.643386	7.66989	5.00967	4.23204e-06	0.00111819	4.10239	A_24_P104407	SYNM	3.4572
0.757893	9.58246	4.47929	2.99705e-05	0.00273655	2.30267	A_23_P17826	SLC5A1	3.42818
0.815078	6.62622	4.2513	6.74257e-05	0.00441411	1.56031	A_24_P100996	ANO5	3.39983
0.849166	6.15179	4.1108	0.000109991	0.00583704	1.11346	A_23_P154849	OLIG1	3.36154
0.650304	7.96531	4.87138	7.11263e-06	0.001416	3.62425	A_23_P143694	SOX10	3.34775
0.745497	8.14147	4.45209	3.30486e-05	0.00286673	2.21304	A_24_P272310	MUSTN1	3.34046
0.737081	11.6596	4.4835	2.95197e-05	0.00273473	2.31657	A_33_P3270599	TPM2	3.33889
0.72474	7.3551	4.53054	2.49093e-05	0.00263043	2.47233	A_23_P143526	S100B	3.33644
0.782858	6.93353	4.3044	5.59235e-05	0.00397155	1.73136	A_33_P3423330	CNTFR-AS1	3.32903
0.634513	11.8567	4.82888	8.33313e-06	0.00151041	3.4785	A_24_P226008	MGLL	3.22281
0.890777	8.02053	3.86441	0.000254191	0.00889594	0.351135	A_32_P7015	TSPAN15	3.2022
1.10332	10.958	3.36719	0.00126245	0.0222001	-1.09508	A_24_P102650	MUC5B	3.19829
0.787987	13.6362	4.17405	8.83338e-05	0.00516976	1.31356	A_23_P64372	TCN1	3.1944
0.982957	12.621	3.60973	0.000586675	0.0142777	-0.405956	A_24_P142305	HBA2	3.17653
1.29132	9.03822	2.99894	0.00380168	0.0410197	-2.07613	A_33_P3242174	C2orf82	3.12503
0.789299	9.4089	4.10532	0.000112093	0.0058675	1.09619	A_23_P210425	MYL9	3.11806
0.698616	6.49054	4.41957	3.71339e-05	0.00309934	2.10623	A_21_P0010977	GLYATL1	3.09503
0.66773	8.97081	4.5245	2.54591e-05	0.00263133	2.4523	A_23_P40108	COL9A3	3.06766
0.605927	6.55403	4.81254	8.85516e-06	0.00151461	3.4226	A_23_P20316	CA3	3.06163
0.649601	10.3854	4.53213	2.47658e-05	0.00262669	2.47763	A_23_P503072	CCL28	2.99216
0.667067	8.53692	4.43236	3.54719e-05	0.00301239	2.14819	A_23_P129413	DPEP3	2.96852
0.773009	8.87909	4.01347	0.000153624	0.00682251	0.808984	A_33_P3347040	DPP9-AS1	2.9479
0.697386	8.14226	4.22709	7.34001e-05	0.00463014	1.48272	A_33_P3409086	S100A1	2.88321
0.681253	10.727	4.24048	7.00367e-05	0.00447989	1.52559	A_23_P143817	MYLK	2.83039
0.69901	15.6099	4.04532	0.000137775	0.00644661	0.908152	A_23_P166848	LTF	2.69876
0.675283	8.55451	4.08292	0.000121089	0.00616095	1.0258	A_33_P3418541	ACTG2	2.64501
0.793178	11.8586	3.6678	0.000486163	0.0129377	-0.236253	A_23_P150053	ACTA2	2.62797
0.723795	8.18289	3.75066	0.000370747	0.0110206	0.00891794	A_23_P251412	SCGN	2.48328
0.682136	8.75452	3.83621	0.000279281	0.00938315	0.265703	A_23_P39251	PLIN5	2.42428
0.684182	7.12136	3.81066	0.000304049	0.00980711	0.188634	A_19_P00323082	H19	2.40631
0.634096	10.9774	3.96267	0.000182593	0.00751663	0.651768	A_23_P67661	COX7A1	2.37058
1.00804	8.45243	2.92801	0.00465895	0.0466433	-2.25542	A_21_P0005477	lnc-NPVF-4	2.35047
0.635221	8.39228	3.92911	0.000204537	0.00791051	0.548566	A_22_P00017815	LINC00638	2.34347
0.97579	9.84351	2.95626	0.00429807	0.0441588	-2.18441	A_23_P2920	SERPINA3	2.30943
0.805808	5.89227	3.32613	0.00143295	0.0238706	-1.20849	A_21_P0007833	MUC19	2.29153
0.73702	8.42128	3.49628	0.0008428	0.0177042	-0.732328	A_33_P3296862	C16orf89	2.2658
0.674408	8.94993	3.65736	0.000502928	0.0131628	-0.266888	A_23_P66137	SOX8	2.22453
0.844738	7.36082	3.16134	0.00236024	0.0310681	-1.65365	A_24_P190007	GP2	2.21917
0.584886	10.7647	3.99744	0.00016225	0.0070496	0.759249	A_23_P118065	HSD17B2	2.21661
0.683944	7.38899	3.61017	0.000585845	0.0142718	-0.404679	A_32_P41604	F5	2.21065
0.623164	14.4872	3.81865	0.00029609	0.00960555	0.212689	A_23_P71270	AZGP1	2.19888
0.658772	12.1779	3.62085	0.000566022	0.0139995	-0.373613	A_21_P0012582	XLOC_l2_010636	2.13914
0.655433	7.93605	3.61568	0.000575531	0.0141483	-0.38865	A_23_P41365	SMR3A	2.12356
0.725347	15.3532	3.33759	0.00138331	0.0234403	-1.17695	A_23_P93602	C6orf58	2.07383
0.661692	9.51606	3.53488	0.000745614	0.0164931	-0.62206	A_33_P3297562	IRX2	2.06943
0.615913	8.65794	3.57055	0.000665368	0.0153909	-0.519472	A_21_P0005438	lnc-RP11-1220K2.2.1-1	1.95672
0.664949	8.63642	3.31531	0.00148136	0.024285	-1.23822	A_23_P426305	AOC3	1.88137
0.597763	8.43993	3.44484	0.000991102	0.0192421	-0.878012	A_23_P12082	CHI3L2	1.79561
0.649423	11.9496	3.18118	0.00222436	0.0300642	-1.6009	A_33_P3285565	CLDN3	1.72278
0.58612	8.48495	3.17509	0.0022653	0.0302972	-1.61713	A_33_P3291816	CLDN22	1.55021
0.590833	10.9129	3.15444	0.00240927	0.0314435	-1.67193	A_23_P129064	GATM	1.54687
0.622614	10.3363	2.9616	0.00423281	0.0438983	-2.17092	A_23_P218369	CCL14	1.47769
0.632637	5.67978	2.89268	0.00514978	0.0497327	-2.34351	A_22_P00003866	lnc-CELF4-4	1.44761
0.59408	8.90174	2.8939	0.00513206	0.0496604	-2.34048	A_33_P3218089	CLDN24	1.36027
-0.643892	6.75615	-2.89434	0.00512565	0.0496379	-2.33938	A_24_P109214	APOC1	-1.47467
-0.614153	6.63555	-2.99069	0.00389332	0.041712	-2.09716	A_23_P70007	HMMR	-1.47991
-0.59969	8.56465	-3.09492	0.00287364	0.0346926	-1.82844	A_23_P103765	FCER1A	-1.52415
-0.595997	9.34804	-3.13602	0.00254484	0.0323947	-1.72058	A_33_P3344831	TMEM45A	-1.54622
-0.656843	7.68572	-2.95842	0.00427157	0.0440543	-2.17895	A_32_P56249	USP30-AS1	-1.55633
-0.591363	8.93533	-3.18529	0.00219714	0.0298959	-1.58994	A_23_P424561	RHOV	-1.57193
-0.671495	9.86671	-2.94517	0.00443656	0.045067	-2.21235	A_23_P215634	IGFBP3	-1.58
-0.666222	7.60162	-2.99089	0.00389105	0.041706	-2.09665	A_23_P18579	PTTG2	-1.60555
-0.619509	12.7307	-3.1346	0.00255564	0.0324641	-1.72434	A_23_P154894	CSTB	-1.60608
-0.690676	9.16908	-2.95793	0.00427762	0.0440715	-2.1802	A_23_P71727	CKS2	-1.63607
-0.61377	7.50573	-3.19658	0.00212405	0.0293787	-1.55982	A_23_P122197	CCNB1	-1.64051
-0.595244	6.07645	-3.2994	0.00155533	0.0250835	-1.28178	A_23_P160537	AUNIP	-1.67155
-0.732174	10.0391	-2.90161	0.00502134	0.0489596	-2.32131	A_23_P156687	CFB	-1.6834
-0.64093	10.8831	-3.16396	0.00234183	0.0309459	-1.64669	A_32_P351968	HLA-DMB	-1.68593
-0.649502	8.22977	-3.16091	0.00236324	0.0310681	-1.65478	A_33_P3381751	TIAM1	-1.70591
-0.594966	7.02375	-3.35067	0.00132861	0.0229147	-1.14083	A_32_P101352	CXorf65	-1.71148
-0.633233	7.38681	-3.22938	0.0019243	0.0280705	-1.47182	A_23_P161563	RAB38	-1.71969
-0.68189	6.57798	-3.11953	0.00267233	0.0331997	-1.76399	A_23_P145096	PLA2G7	-1.75458
-0.704171	5.80026	-3.06624	0.00312605	0.0364441	-1.90306	A_22_P00000688	lnc-ADAM2-1	-1.76395
-0.68335	7.42866	-3.12875	0.00260032	0.0327746	-1.73974	A_33_P3350488	NUSAP1	-1.76644
-0.659523	7.83149	-3.22369	0.00195761	0.0282815	-1.48712	A_23_P50108	NDC80	-1.78617
-0.65001	6.41261	-3.25582	0.00177626	0.0269131	-1.40041	A_23_P88331	DLGAP5	-1.78785
-0.678886	6.983	-3.18594	0.00219288	0.0298713	-1.58821	A_23_P139786	OASL	-1.80515
-0.623159	7.01761	-3.37188	0.00124427	0.0219948	-1.08209	A_32_P321996	WDFY4	-1.81033
-0.59802	7.26652	-3.49305	0.000851472	0.0177821	-0.741536	A_21_P0014019	LGALS2	-1.83582
-0.734008	8.9238	-3.06641	0.00312448	0.0364441	-1.90261	A_23_P150979	MUCL1	-1.83885
-0.642226	7.06616	-3.34178	0.00136554	0.0233565	-1.16538	A_23_P88731	RAD51	-1.83978
-0.585009	8.06188	-3.56773	0.000671387	0.0154565	-0.527589	A_23_P30315	TRIM7	-1.85625
-0.588383	6.15362	-3.56197	0.000683885	0.0156263	-0.544212	A_23_P80902	KIF15	-1.86224
-0.645571	7.77763	-3.36995	0.00125173	0.0220785	-1.08744	A_23_P64828	OAS1	-1.87376
-0.685164	9.3547	-3.29945	0.00155513	0.0250835	-1.28167	A_32_P214665	PCP4L1	-1.9241
-0.733669	8.19568	-3.17046	0.00229685	0.0305635	-1.62944	A_23_P65757	CCNB2	-1.93605
-0.619198	7.15352	-3.54161	0.000729799	0.016266	-0.602753	A_33_P3340025	GINS1	-1.9423
-0.62171	8.20345	-3.54222	0.000728385	0.016266	-0.601006	A_33_P3352970	IRAK2	-1.9507
-0.809994	7.52148	-2.99455	0.00385015	0.0413772	-2.08732	A_23_P6535	KLHDC7B	-1.95575
-0.597706	8.99171	-3.66091	0.000497167	0.0130684	-0.256479	A_23_P7172	PGM2	-1.97452
-0.705166	5.93986	-3.33371	0.00139991	0.0235139	-1.18763	A_23_P128855	SLC39A2	-2.01247
-0.722166	6.95054	-3.2874	0.00161345	0.025496	-1.31457	A_23_P405878	C12orf54	-2.01646
-0.68295	10.4401	-3.42685	0.00104854	0.019896	-0.928593	A_23_P56559	DHRS9	-2.03479
-0.782752	7.23017	-3.14831	0.00245362	0.0318234	-1.68814	A_23_P57379	CDC45	-2.04313
-0.873769	8.3818	-2.94332	0.00446001	0.0452295	-2.21699	A_23_P118815	BIRC5	-2.05394
-0.645334	10.1297	-3.60689	0.000592069	0.0142981	-0.414214	A_23_P18493	PTPN13	-2.0829
-0.676124	7.83778	-3.52206	0.000776664	0.0169324	-0.658793	A_23_P134347	CPVL	-2.10259
-0.608166	6.27679	-3.77323	0.000344163	0.0105677	0.0763108	A_21_P0014466	LOC101928152	-2.10622
-0.761258	10.1893	-3.27296	0.00168608	0.0261193	-1.35389	A_24_P152968	AKR1C1	-2.11106
-0.843302	11.2246	-3.07902	0.00301105	0.0357092	-1.86985	A_23_P210465	PI3	-2.1262
-0.87214	9.98203	-3.01567	0.00362214	0.0397535	-2.03339	A_33_P3374678	TMPRSS11D	-2.12892
-0.591125	6.37353	-3.86901	0.00025031	0.00882371	0.3651	A_23_P77043	CATSPERB	-2.12895
-0.710614	6.74918	-3.45253	0.000967449	0.0189801	-0.856316	A_24_P250922	PTGS2	-2.14205
-0.887111	8.3913	-3.00856	0.00369749	0.0401991	-2.05158	A_33_P3358208	PADI1	-2.15754
-0.814535	8.1	-3.19104	0.00215963	0.0297124	-1.57461	A_33_P3343120	IRF8	-2.17124
-0.704616	9.75932	-3.50791	0.00081234	0.0173652	-0.699212	A_32_P52153	UNC5B-AS1	-2.17745
-0.639408	5.40625	-3.75583	0.000364485	0.0109426	0.0243459	A_21_P0006269	lnc-FAM75A6-2	-2.19849
-0.660173	7.00212	-3.68357	0.000461844	0.0125754	-0.189871	A_33_P3360972	EXOC3L4	-2.20201
-0.726579	10.4111	-3.46927	0.000917843	0.0185	-0.80902	A_23_P67847	GALNT14	-2.20679
-0.727677	7.24501	-3.48813	0.000864818	0.017929	-0.755523	A_33_P3242623	SLC7A11	-2.22893
-0.863891	6.23815	-3.13176	0.00257725	0.0326192	-1.73182	A_32_P87013	CXCL8	-2.23648
-0.724691	9.71272	-3.52826	0.000761499	0.0167834	-0.641041	A_24_P48204	SECTM1	-2.25983
-0.61475	5.90571	-3.98504	0.000169245	0.00719233	0.720835	A_33_P3610406	ECEL1P2	-2.31852
-0.624339	9.85334	-3.95672	0.000186311	0.0075925	0.63343	A_23_P1682	TMEM45B	-2.32863
-0.8269	11.2984	-3.32513	0.00143736	0.0239114	-1.21125	A_23_P124619	S100A14	-2.35041
-0.605988	5.60951	-4.07635	0.000123855	0.00616095	1.00522	A_21_P0007522	lnc-CLEC2D-7	-2.36765
-0.805653	13.7783	-3.39793	0.00114758	0.0208627	-1.00957	A_23_P502413	SERPINB4	-2.36879
-0.734283	6.60046	-3.60902	0.000588017	0.0142957	-0.408017	A_23_P94422	MELK	-2.37218
-0.642514	6.28313	-3.96014	0.000184168	0.00756863	0.643956	A_21_P0013178	LOC102659288	-2.39965
-0.801749	6.44601	-3.44788	0.000981682	0.0191819	-0.869435	A_23_P51085	SPC25	-2.41168
-0.666469	6.31892	-3.90311	0.000223254	0.008293	0.468995	A_24_P175187	SAMD9	-2.43341
-0.80789	6.08514	-3.46766	0.000922506	0.0185443	-0.813576	A_21_P0013726	LOC403323	-2.45197
-0.635126	7.04568	-4.08661	0.00011956	0.00615225	1.03739	A_33_P3386262	CDT1	-2.49123
-0.846766	9.03027	-3.41938	0.00107333	0.0202143	-0.949565	A_23_P111583	CD36	-2.51427
-0.767563	7.01158	-3.64579	0.000522154	0.0134344	-0.300776	A_23_P379614	OIP5	-2.5193
-0.923956	8.88476	-3.24215	0.0018514	0.0274187	-1.43738	A_23_P50096	TYMS	-2.52471
-0.849237	13.6579	-3.46355	0.000934503	0.0186919	-0.825187	A_23_P55632	SERPINB3	-2.57269
-0.723258	13.0966	-3.83916	0.000276552	0.00934199	0.274614	A_23_P27133	KRT15	-2.57352
-0.662099	7.43077	-4.0733	0.000125164	0.00616095	0.995628	A_23_P76078	IL23A	-2.58386
-0.758729	8.92597	-3.75365	0.000367116	0.0109739	0.0178327	A_24_P274270	STAT1	-2.60638
-0.824804	10.3025	-3.57387	0.000658322	0.0153213	-0.509876	A_33_P3329028	AKR1C8P	-2.62416
-0.790582	10.8793	-3.67949	0.000468025	0.0126957	-0.201888	A_23_P111000	PSMB9	-2.63242
-0.82199	9.90819	-3.63681	0.000537569	0.0135864	-0.327051	A_23_P7636	PTTG1	-2.68755
-0.702492	8.14937	-4.02564	0.00014737	0.00669032	0.846828	A_23_P323751	FAM83D	-2.69166
-0.972041	7.18458	-3.30483	0.0015297	0.0248351	-1.26693	A_32_P62997	PBK	-2.73668
-0.879483	10.3501	-3.54093	0.000731397	0.0162825	-0.604723	A_23_P107421	TK1	-2.75792
-0.581419	15.0466	-4.73917	1.16193e-05	0.00173135	3.17274	A_23_P201711	S100A6	-2.86919
-0.789398	7.55743	-3.89872	0.000226577	0.00832951	0.455571	A_33_P3367984	ABCA12	-2.87719
-0.696648	8.37937	-4.24026	7.00905e-05	0.00447989	1.52488	A_23_P115482	UBE2T	-2.89411
-0.725358	14.1175	-4.13836	9.99878e-05	0.00548195	1.20044	A_23_P94501	ANXA1	-2.90147
-0.884796	8.56429	-3.66481	0.000490911	0.0130025	-0.245037	A_33_P3246829	IL1RN	-2.92779
-0.584534	5.99075	-4.78653	9.7524e-06	0.00156865	3.33382	A_23_P92885	SLCO6A1	-2.92903
-0.603809	6.64975	-4.69809	1.35177e-05	0.0018549	3.03363	A_23_P253752	MTFR2	-2.94001
-0.707307	7.38574	-4.31774	5.33483e-05	0.00390278	1.77449	A_23_P92441	MAD2L1	-3.02224
-0.858795	7.09611	-3.82502	0.000289881	0.00954016	0.23191	A_23_P101642	PTPRH	-3.03823
-0.764073	12.9499	-4.14229	9.86349e-05	0.00544458	1.21287	A_24_P270460	IFI27	-3.06085
-0.792904	10.0319	-4.0731	0.000125249	0.00616095	0.995009	A_24_P365721	SLC6A14	-3.09409
-0.64973	8.04071	-4.68802	1.40272e-05	0.00191401	2.99962	A_23_P104798	IL18	-3.15316
-0.715814	8.24395	-4.42874	3.59339e-05	0.00304098	2.13633	A_23_P254733	CENPU	-3.18143
-0.806898	11.2908	-4.11143	0.00010975	0.00583704	1.11545	A_23_P59005	TAP1	-3.19499
-0.633508	8.23066	-4.81789	8.68078e-06	0.00151461	3.4409	A_33_P3716128	SMC4	-3.20646
-1.09474	10.7567	-3.41792	0.00107825	0.0202143	-0.953668	A_21_P0009341	WFDC21P	-3.2484
-0.836346	10.1767	-4.07025	0.000126479	0.00618094	0.986102	A_32_P25050	RDH10	-3.26006
-0.586394	9.24418	-5.13445	2.63634e-06	0.000889325	4.53865	A_23_P212617	TFRC	-3.27149
-0.817278	7.46468	-4.25741	6.59934e-05	0.00435566	1.57994	A_21_P0000076	CDK1	-3.41663
-0.877746	10.1017	-4.09611	0.000115708	0.00600497	1.06724	A_23_P218442	CEACAM6	-3.45537
-0.914322	6.83466	-4.07293	0.00012532	0.00616095	0.994495	A_23_P118834	TOP2A	-3.56767
-0.967328	8.14177	-3.93763	0.000198737	0.00783593	0.574717	A_33_P3619171	PMAIP1	-3.58078
-0.752396	10.8776	-4.64442	1.64584e-05	0.00209384	2.85277	A_23_P122443	HIST1H1C	-3.59917
-1.30754	11.0947	-3.26414	0.00173193	0.0264781	-1.37785	A_32_P204676	FABP5	-3.61073
-0.980099	9.55935	-3.92695	0.000206035	0.00794313	0.541936	A_23_P153301	CEACAM5	-3.6127
-1.39414	9.10038	-3.17741	0.00224962	0.0302565	-1.61095	A_23_P112026	IDO1	-3.69153
-1.01589	8.3298	-3.98738	0.000167899	0.00717945	0.7281	A_23_P117852	KIAA0101	-3.83494
-1.48027	7.13174	-3.17189	0.00228705	0.0305208	-1.62563	A_23_P500000	SCEL	-3.90898
-1.20362	9.50303	-3.66361	0.000492823	0.0130225	-0.248549	A_23_P151851	DUOX2	-3.98074
-1.5004	9.97759	-3.28364	0.00163204	0.0256729	-1.3248	A_23_P26024	C15orf48	-4.18203
-0.790723	7.74609	-5.02747	3.95682e-06	0.0010934	4.16435	A_23_P5370	RPRM	-4.272
-0.958332	8.16975	-4.48007	2.98858e-05	0.00273655	2.30527	A_24_P11506	KYNU	-4.33601
-1.64259	7.88258	-3.25228	0.00179542	0.0269991	-1.40999	A_23_P157628	DEFB4A	-4.51028
-1.16584	8.41774	-4.1944	8.22869e-05	0.00499578	1.37831	A_24_P200219	UPK1B	-4.76206
-0.886582	13.7138	-5.34618	1.16958e-06	0.000683187	5.2885	A_33_P3371718	SAT1	-5.25918
-1.79227	7.80187	-3.78486	0.000331189	0.0103661	0.111131	A_33_P3250443	DUOXA2	-6.23696
-1.23496	15.0339	-5.45645	7.62529e-07	0.000584278	5.68343	A_23_P58266	S100P	-7.55517

## Sheet: IEIvsCtrl
log2FC	AveExpr	t-statistic	P.Value	adj.P.Val	B-statistic	ProbeID	GeneSymbol	score
-0.795878	9.4342	-3.98301	0.000170413	0.0157977	0.734934	A_23_P131676	ACKR3	-2.99926
0.721821	7.10044	6.52652	1.06163e-08	6.53552e-05	9.54805	A_33_P3347320	ADIRF-AS1	5.75582
-0.659464	9.56919	-4.49538	2.8282e-05	0.0065582	2.35877	A_23_P55477	ADORA2B	-2.99957
0.613148	8.58011	3.57467	0.000656626	0.0309003	-0.474735	A_24_P87036	ANO1	1.95146
-0.89087	6.04368	-4.30401	5.60015e-05	0.00912862	1.73975	A_23_P2083	ASCL3	-3.7878
-0.594019	7.1011	-4.1639	9.1506e-05	0.0113393	1.29578	A_23_P356554	BAG2	-2.39898
0.748702	6.8377	4.91621	6.01478e-06	0.00275636	3.76571	A_23_P159952	BEX1	3.90881
-0.59206	7.61874	-3.28791	0.00161094	0.0476572	-1.27239	A_19_P00809992	C11orf74	-1.65358
-0.85804	5.64942	-4.20917	7.81496e-05	0.0106039	1.43834	A_33_P3395562	C1orf141	-3.52403
-1.24981	7.28479	-3.3002	0.00155155	0.0468707	-1.23915	A_32_P142700	C22orf15	-3.51102
-1.1001	9.53286	-3.99038	0.000166194	0.0155851	0.757509	A_33_P3347869	C3	-4.1577
-1.2212	6.72135	-3.37475	0.00123324	0.0420857	-1.03567	A_24_P255100	C9orf135	-3.55241
-0.622349	5.85211	-3.54057	0.000732222	0.0324529	-0.571941	A_24_P192988	CCDC89	-1.95129
-1.33303	7.15421	-3.54571	0.00072034	0.0323477	-0.557353	A_23_P384532	CFAP53	-4.18898
-0.62306	8.36072	-3.41947	0.00107303	0.0396075	-0.912107	A_23_P25674	CKB	-1.85011
0.986809	9.28714	3.57751	0.000650694	0.0308071	-0.466636	A_23_P208482	CLEC4M	3.14459
-0.674457	8.40692	-3.59448	0.000616196	0.0300525	-0.418005	A_22_P00010449	CLUAP1	-2.1652
1.03894	6.22659	4.25971	6.5464e-05	0.00968659	1.59849	A_23_P117851	CPLX3	4.34691
0.617941	5.37649	3.65949	0.000499467	0.0275081	-0.230315	A_23_P144394	CSN2	2.04013
-0.60586	12.8517	-3.86855	0.0002507	0.01988	0.387668	A_23_P44724	CSRP2	-2.18161
1.86362	6.73312	4.77261	1.02684e-05	0.00386932	3.27905	A_23_P112859	CST1	9.29666
1.79241	6.56623	4.97494	4.82407e-06	0.00244384	3.96657	A_24_P237175	CST2	9.5295
-1.53389	10.48	-4.89966	6.39914e-06	0.00287819	3.70932	A_23_P114713	CYP4B1	-7.96683
0.907998	8.85495	5.39647	9.62659e-07	0.00101657	5.4357	A_33_P3235147	DLX5	5.46299
0.660386	6.73329	6.46833	1.34542e-08	6.53552e-05	9.3321	A_33_P3242883	DLX6	5.19799
-1.57557	7.35623	-3.46872	0.00091941	0.036251	-0.774719	A_23_P75063	DYDC2	-4.7842
-1.5472	7.22588	-3.31627	0.00147698	0.0457562	-1.19554	A_24_P215240	ENKUR	-4.37954
-0.662725	14.3816	-3.88271	0.000239081	0.0192278	0.430315	A_23_P210210	EPAS1	-2.40003
-0.666946	7.00212	-3.47436	0.000903233	0.0359046	-0.758922	A_33_P3360972	EXOC3L4	-2.03032
0.659298	6.12338	3.90421	0.000222434	0.0184385	0.4952	A_32_P60065	F2RL2	2.40828
0.691927	7.9419	4.23567	7.12279e-05	0.0101169	1.52218	A_23_P12199	FAM46B	2.86966
0.616678	12.0679	3.72402	0.000404652	0.0247561	-0.0418845	A_23_P53176	FOLR1	2.09234
0.790232	10.8507	4.48085	2.98018e-05	0.00658024	2.31129	A_32_P164246	FOXQ1	3.5764
1.02724	5.58759	6.13193	5.24821e-08	0.000159336	8.09059	A_23_P305581	GPR26	7.47833
0.80722	6.95386	4.0776	0.000123326	0.0134855	1.0264	A_24_P12059	GYPA	3.15538
0.641789	6.83456	6.26899	3.01972e-08	0.000104776	8.59484	A_24_P23625	HS3ST3B1	4.82628
0.798132	6.1372	3.39132	0.0011714	0.0415797	-0.99001	A_23_P9711	HS3ST4	2.33956
1.02631	9.34445	5.15747	2.41482e-06	0.00172503	4.59705	A_23_P14986	HSD11B2	5.76488
-0.690216	12.9499	-3.49352	0.000850191	0.034999	-0.705046	A_24_P270460	IFI27	-2.1193
0.987275	7.19199	3.76549	0.000353064	0.0230517	0.0803354	A_23_P35092	IL19	3.40822
-0.864354	6.64029	-3.78288	0.000333358	0.0226796	0.13184	A_23_P300076	IQCG	-3.00544
0.585225	10.2271	3.34003	0.00137295	0.0439503	-1.13083	A_33_P3216372	IQGAP2	1.67512
-0.639719	7.64531	-3.7515	0.000369714	0.023504	0.0390258	A_23_P429950	KAL1	-2.1956
-0.639904	7.11968	-3.42701	0.00104804	0.0389814	-0.891168	A_23_P218058	KLRC4	-1.90667
1.81938	8.46258	3.33266	0.00140444	0.0445313	-1.15093	A_23_P366936	KRT6C	5.18979
-1.5804	8.54336	-3.38274	0.00120306	0.0418921	-1.01368	A_33_P3332406	LDLRAD1	-4.61431
0.90225	9.53882	3.66746	0.000486697	0.0271121	-0.207147	A_23_P165186	LIN37	2.98892
0.630241	7.25481	5.88103	1.43246e-07	0.000316286	7.17428	A_32_P176911	LINC00239	4.31332
0.633892	6.86772	3.57404	0.000657968	0.0309003	-0.476557	A_22_P00023500	LINC01475	2.01691
0.893704	6.89739	3.33837	0.00137999	0.0440436	-1.13537	A_21_P0001299	lnc-ACOT11-1	2.55611
1.08444	6.65997	3.79798	0.000317105	0.0218583	0.176679	A_22_P00001020	lnc-AL391421.1-3	3.79424
0.692556	7.61084	4.49584	2.82352e-05	0.0065582	2.36027	A_21_P0008575	lnc-ALDH1A3-1	3.15058
0.703263	5.95018	3.95572	0.000186944	0.0167546	0.651579	A_21_P0001553	lnc-DPYD-1	2.62197
0.882399	6.40136	3.65328	0.000509632	0.0277532	-0.248332	A_21_P0009816	lnc-FOXA2-8	2.90551
0.722767	6.89317	4.37781	4.31029e-05	0.00824318	1.97679	A_22_P00009296	lnc-LRRC36-1	3.15523
1.08955	10.8544	3.40074	0.00113759	0.0411106	-0.964002	A_22_P00010013	lnc-MME-4	3.20765
-0.821643	6.01608	-3.71724	0.000413734	0.0250593	-0.0617659	A_22_P00023117	lnc-RFC2-2	-2.77985
0.610675	7.14369	3.99158	0.000165519	0.0155819	0.761178	A_21_P0009357	lnc-SLC39A11-3	2.30905
-2.10837	10.0339	-3.48422	0.000875564	0.0353613	-0.731229	A_21_P0014360	LOC101927057	-6.44678
0.714158	8.00437	3.59203	0.000621053	0.0301683	-0.425015	A_22_P00010120	LOC101928069	2.29021
1.01677	6.75126	3.66539	0.000489989	0.0272155	-0.213178	A_22_P00023864	LOC101929723	3.36531
-0.607777	6.28313	-3.4974	0.000839837	0.0347495	-0.694134	A_21_P0013178	LOC102659288	-1.8694
-0.83849	6.75509	-3.26563	0.00172409	0.0491321	-1.33242	A_33_P3692979	LOC283485	-2.31712
-0.668433	5.67174	-3.99804	0.000161923	0.0153624	0.780963	A_23_P67569	LPPR3	-2.53382
1.38842	12.4696	3.63163	0.000546644	0.0283157	-0.31101	A_33_P3268622	LY6D	4.52945
0.74038	7.72588	4.22091	7.50057e-05	0.0102705	1.47546	A_33_P3329444	MAMSTR	3.054
0.648987	7.44418	4.07847	0.000122957	0.0134855	1.02911	A_24_P196592	MMP28	2.5377
0.950815	5.89227	3.66418	0.000491914	0.0272155	-0.216684	A_21_P0007833	MUC19	3.1454
-0.725932	7.69002	-3.39401	0.00116165	0.0415162	-0.982588	A_23_P46063	NME7	-2.13055
0.591486	6.46164	5.34676	1.16698e-06	0.00110683	5.26013	A_33_P3333800	NOXO1	3.50925
1.06151	7.21514	5.03923	3.78467e-06	0.0021824	4.18759	A_24_P250227	NR1D1	5.7555
0.718225	9.39889	3.42902	0.00104147	0.0388127	-0.885574	A_23_P89589	PER1	2.142
1.16146	16.3192	3.52272	0.000775031	0.0335543	-0.622591	A_23_P8702	PIP	3.61293
-1.15111	8.51685	-3.75075	0.000370637	0.023504	0.03679	A_33_P3306679	PLEKHG7	-3.9495
1.58561	15.7603	3.58976	0.00062561	0.030329	-0.431542	A_23_P116890	PRB3	5.07982
1.75761	15.0743	3.64506	0.000523387	0.0278772	-0.272145	A_33_P3217776	PRB4	5.76704
2.41572	10.4817	3.44965	0.000976248	0.037554	-0.82808	A_23_P99076	PRH2	7.27237
0.828563	15.8446	3.57164	0.000663037	0.0309689	-0.483407	A_23_P76291	PRR4	2.63356
-0.827503	10.8793	-3.5957	0.000613781	0.029995	-0.414499	A_23_P111000	PSMB9	-2.65793
0.840632	11.1238	5.57793	4.7442e-07	0.000677807	6.08134	A_23_P331670	PYGB	5.31602
0.769112	6.89941	4.95768	5.14771e-06	0.00250055	3.90744	A_23_P399255	RNF182	4.06736
-0.594565	7.74609	-3.52938	0.0007588	0.0332067	-0.603727	A_23_P5370	RPRM	-1.85497
1.35468	13.9976	4.57976	2.08363e-05	0.00602468	2.63603	A_33_P3210379	SCGB3A1	6.34152
1.25531	7.3811	3.70507	0.000430537	0.0253808	-0.0974159	A_23_P5968	SEMG2	4.22537
0.586588	11.4645	3.54986	0.000710854	0.0320915	-0.545531	A_33_P3277447	SLC26A2	1.84671
0.735669	10.8839	5.59064	4.51359e-07	0.000677807	6.12681	A_23_P154688	SLC4A11	4.66817
0.592622	9.58246	3.27003	0.00170115	0.0489682	-1.32058	A_23_P17826	SLC5A1	1.64112
0.900281	9.22778	4.60805	1.87968e-05	0.00550263	2.72957	A_33_P3381235	SLCO4A1-AS1	4.25465
0.687193	7.22599	3.37557	0.00123011	0.0420857	-1.03341	A_23_P253542	SMPX	1.99977
0.67175	7.93605	3.45973	0.000945799	0.0368459	-0.799895	A_23_P41365	SMR3A	2.03151
-1.1605	11.9637	-3.40779	0.00111287	0.0405846	-0.94449	A_33_P3587376	SNAR-A3	-3.42761
1.06435	13.0879	4.11375	0.000108877	0.0124093	1.13884	A_19_P00321511	SNHG5	4.21807
0.588984	8.50481	4.40148	3.96128e-05	0.0078862	2.05329	A_21_P0000382	SNORD71	2.59281
-0.625625	5.67718	-3.51046	0.000805794	0.0341138	-0.657276	A_23_P312874	SPATS1	-1.93554
0.71187	9.13658	5.05099	3.62e-06	0.0021824	4.22811	A_33_P3239185	SYT7	3.87349
-1.06648	8.034	-3.33416	0.00139799	0.0444428	-1.14685	A_23_P393620	TFPI2	-3.04427
-0.59106	6.74641	-3.83472	0.000280677	0.0207025	0.286213	A_32_P86763	TGM2	-2.09932
-2.0076	9.53189	-3.78137	0.000335033	0.0227298	0.127345	A_23_P107775	TMEM190	-6.97624
-0.594382	11.358	-3.84568	0.000270606	0.0202854	0.319028	A_21_P0000113	TNFSF10	-2.12055
-1.31056	7.48093	-3.33958	0.00137484	0.0439503	-1.13205	A_21_P0000622	WDR86-AS1	-3.7505
0.597415	6.2035	3.86179	0.000256432	0.020091	0.367359	A_21_P0012277	XLOC_l2_009448	2.14533
